# Supplementary material for: Minimal requirements for a neuron to coregulate many properties and the implications for ion channel correlations and robustness
Source: eLife. 2022 Mar 16;11:e72875. doi: 10.7554/eLife.72875 (PMC8986315; doi:10.7554/eLife.72875)
Supplement: Figure 2—source data 1. — Data include all spikes times (for panel A) as well as trial-averaged values of membrane potential, spike amplitude, firing rate, and coefficient of variation of the interspike interval (for panels C–F, respectively). [file elife-72875-fig2-data1.xlsx]

## Sheet: panel A-spike times
SPIKE TIMES	Baseline	Trial 1	Trial 2	Trial 3	Trial 4	Trial 5		Block native Im	Trial 1	Trial 2	Trial 3	Trial 4	Trial 5		Block +virtual IM	Trial 1	Trial 2	Trial 3	Trial 4	Trial 5		Block +virtual IAHP	Trial 1	Trial 2	Trial 3	Trial 4	Trial 5
(s)	>>>	0.0771	0.0793	0.0775	0.0776	0.0773		>>>	0.0438	0.0758	0.0423	0.0461	0.0434		>>>	0.0787	0.0801	0.08	0.0797	0.0791		>>>	0.0454	0.0796	0.0432	0.3783	0.0438
		0.3809	0.3794	0.3791	0.3799	0.3804			0.0755	0.2732	0.0761	0.0778	0.0776			0.3815	0.6616	0.3808	0.3801	0.3798			0.0777	0.5099	0.2728	0.5461	0.08
		0.5462	0.7402	0.5093	0.5483	0.5463			0.1339	0.3515	0.1414	0.2758	0.1384			0.6624	0.9408	0.9407	0.9408	0.7408			0.3796	0.7431	0.3803	0.7994	0.3797
		0.7759	0.9422	0.7738	0.7618	0.7718			0.2723	0.5128	0.2184	0.379	0.3512			0.9417	1.5411	1.5413	1.5414	0.9407			0.661	0.9419	0.6616	1.1388	0.6606
		0.9408	1.5437	0.9408	0.9408	0.9411			0.3504	0.544	0.3485	0.5112	0.5445			1.5427	1.7114	1.7114	1.7107	1.2399			0.8059	1.2393	0.8017	1.5404	0.8056
		1.5421	1.7117	1.1564	1.2403	1.541			0.3794	0.5837	0.3797	0.5462	0.6608			1.7114	2.3071	2.182	2.1827	1.5422			1.1559	1.5434	1.1565	1.7103	1.1561
		2.009	2.2442	1.5414	1.5964	1.7113			0.4869	0.6608	0.5109	0.6668	0.7324			2.1818	2.5254	2.4219	2.5265	1.7107			1.5412	1.8347	1.5411	1.9982	1.54
		2.242	2.3446	1.7111	1.7129	2.2426			0.5432	0.7315	0.5453	0.7309	0.8832			2.5255	2.9487	2.7174	3.0999	2.184			1.711	2.2359	1.7126	2.3056	1.7114
		2.7454	2.8158	2.3051	2.2422	2.3457			0.6614	0.8895	0.6504	0.887	0.9396			2.7185	3.1845	3.0987	3.7074	2.5279			1.9821	2.4252	2.0077	2.525	2.2324
		3.1917	3.1872	2.526	2.3472	2.7443			0.7321	0.9408	0.7311	0.9423	1.017			3.1873	3.3619	3.3618	3.9212	2.8175			2.3053	2.7424	2.3053	2.8149	2.4181
		3.6254	3.6273	2.8164	2.8242	3.193			0.8002	1.0184	0.8018	1.0175	1.1206			3.6179	3.7078	3.6192	4.8089	3.3624			2.5244	3.0981	2.5255	3.1848	2.7173
		3.7088	3.8176	3.1973	3.3606	3.5335			0.8804	1.1205	0.883	1.12	1.2383			3.8179	3.9201	3.9199	4.9103	3.618			2.8117	3.3611	2.8117	3.5242	3.0942
		3.9308	3.9253	3.3603	3.6184	3.7091			0.9381	1.2002	0.9383	1.1993	1.3546			3.9224	4.5934	4.8076	5.1279	3.921			3.0976	3.6972	3.0985	3.7097	3.3609
		4.6829	4.3442	3.7086	3.9226	3.9245			1.0173	1.356	1.0171	1.3583	1.5417			4.5946	4.8102	4.9105	5.5031	4.5931			3.3618	3.9213	3.5155	4.0014	3.6296
		4.8101	4.8104	3.9245	4.347	4.3474			1.1198	1.5424	1.1208	1.5412	1.6566			4.8107	4.911	5.1255	5.6278	4.8108			3.6159	4.3414	3.7069	4.4481	3.9201
		4.9132	4.9116	4.3447	4.8098	4.6869			1.1985	1.7097	1.1591	1.6548	1.7095			4.911	5.1267	5.5032	6.291	4.9114			3.8198	4.5933	3.9994	4.6817	4.3389
		5.1265	5.3064	4.8092	4.911	4.8108			1.2406	2.0754	1.2366	1.7107	1.9467			5.1259	5.5031	5.6256	6.5312	5.1259			4.0023	4.8115	4.3422	4.9099	4.5934
		5.5019	5.5039	4.9112	5.1248	4.9112			1.3569	2.1817	1.3545	1.8188	2.0743			5.5047	6.2911	6.125	6.6602	5.5034			4.3411	4.9128	4.5912	5.3052	4.8094
		5.6276	6.1791	5.1256	5.501	5.502			1.455	2.3066	1.4556	1.9821	2.1804			5.6275	6.4342	6.2928	7.1602	5.6274			4.595	5.4896	4.8085	5.5028	5.1246
		6.2945	6.4342	5.6267	5.6263	5.6267			1.5407	2.3449	1.5407	2.0753	2.3068			6.2904	6.5347	6.5327	7.7638	6.2912			4.808	5.6287	5.1252	5.8947	5.4998
		6.4344	6.5338	6.1253	6.1781	6.1251			1.5945	2.5242	1.5742	2.1815	2.4213			6.5328	6.6604	6.6595	8.0639	6.4346			4.912	5.977	5.4811	6.1249	5.7391
		6.6631	6.6593	6.5321	6.4362	6.2922			1.6697	2.7143	1.7076	2.3042	2.5237			6.6595	7.0416	6.8575	8.1852	6.6601			5.3043	6.2893	5.6262	6.4322	6.1232
		7.037	7.0422	6.6587	6.5331	6.4337			1.7107	2.8128	1.7485	2.4002	2.715			7.0387	7.5724	7.1608	8.8365	7.1589			5.5028	6.53	5.9755	6.658	6.4179
		7.7647	7.1602	7.0378	6.66	6.5356			1.8153	2.9135	1.8336	2.5229	2.7983			7.5727	7.7647	7.7667	9.0912	7.7666			5.6277	6.6647	6.1832	7.0364	6.5338
		7.9718	7.7648	7.1589	7.041	6.6613			1.9416	3.0497	1.9449	2.7156	2.9475			7.7664	8.1868	8.0631	9.3129	7.9176			5.9788	7.0381	6.4342	7.4335	6.663
		8.8777	7.9729	7.9721	7.1608	7.039			1.9817	3.0963	2.0775	2.8013	3.049			8.0653	8.4841	8.1862	9.9384	8.8363			6.1817	7.4308	6.6597	7.7647	7.0418
		9.0937	8.8766	8.191	7.9701	7.627			2.075	3.186	2.1824	2.9138	3.0979			8.8359	8.8399	8.8357	10.3312	9.0899			6.4343	7.7644	7.0351	7.9721	7.4331
		9.317	9.0934	8.484	8.0681	7.971			2.1803	3.3593	2.3015	3.0493	3.1829			9.0896	9.0912	9.0907	10.4864	9.3149			6.6594	7.9722	7.2189	8.1859	7.7633
		10.2112	9.3144	8.8393	8.4842	8.4861			2.3055	3.6109	2.3397	3.0981	3.346			9.313	9.3129	9.3142	11.0949	9.9386			7.0337	8.3468	7.5635	8.4839	7.9713
		10.3874	10.213	9.0898	8.848	8.8761			2.3404	3.7078	2.4004	3.1837	3.6133			9.9376	9.9381	9.9376	11.5323	10.3318			7.1619	8.5896	7.7668	8.8386	8.1849
		10.5477	10.3299	9.4647	9.0943	9.091			2.3975	3.7816	2.5238	3.3586	3.7102			10.3307	10.3314	10.2148	12.017	10.4859			7.5638	8.8773	8.0634	9.0914	8.5917
		11.0944	10.4847	10.2113	9.3152	9.1882			2.5233	3.9176	2.5727	3.5265	3.7796			10.4854	10.4855	10.387	12.3874	10.953			7.7661	9.1858	8.4152	9.3178	8.8379
		11.9839	11.2068	10.3866	10.2136	9.3155			2.5936	3.9956	2.7145	3.6128	3.8164			10.9522	10.6858	10.6855	12.5364	11.0958			7.9728	9.4714	8.834	9.7229	9.1864
		12.1924	11.5688	10.5481	10.3306	9.9405			2.7138	4.0526	2.7992	3.7113	3.9172			11.0944	11.0938	10.9517	12.9556	12.0174			8.1849	9.8075	9.09	10.0542	9.4699
		12.3897	11.7459	11.0949	10.4861	10.3299			2.8014	4.1765	2.9117	3.7805	3.9949			12.018	11.9388	11.0962	13.4066	12.1963			8.4821	10.0764	9.3129	10.3308	9.8454
		12.537	11.9976	11.2121	10.685	10.488			2.9472	4.2967	3.0498	3.8159	4.0933			12.1966	12.0213	12.0172	14.0018	12.3888			8.8344	10.3851	9.5861	10.5488	10.0763
		12.9538	12.1862	11.5803	11.0961	10.6838			3.0491	4.4248	3.0955	3.918	4.2986			12.3893	12.387	12.3891	14.305	12.5383			9.0895	10.5483	9.9376	10.9496	10.3846
		13.4752	12.3909	11.7445	11.2109	11.0969			3.0962	4.517	3.1831	3.997	4.4316			12.5381	12.5358	12.502	14.4632	12.9336			9.3146	10.949	10.2112	11.2055	10.5505
		13.6103	12.5361	11.9876	11.5793	11.2115			3.183	4.5925	3.3585	4.0949	4.5141			12.9542	12.9545	12.9542	14.9252	13.4051			9.5872	11.2044	10.3865	11.568	10.9527
		14.0256	12.9644	12.3911	11.9806	11.5799			3.2429	4.8081	3.505	4.2948	4.5909			13.3132	13.4039	13.4048	15.2583	13.6038			9.9374	11.5694	10.683	11.9566	11.2052
		14.4179	13.4788	12.5357	12.1968	11.9834			3.3585	4.9093	3.6123	4.3471	4.9097			13.574	14.0039	13.6068	15.483	14.0033			10.0775	11.937	11.0935	12.188	11.5675
		14.5495	13.7978	12.9531	12.3013	12.1929			3.5257	4.9864	3.702	4.4318	4.9876			14.0042	14.3059	14.002	16.2273	14.3054			10.3311	12.0181	11.214	12.3877	11.9377
		15.0829	14.4629	13.3134	12.5333	12.3882			3.6147	5.0393	3.7826	4.5362	5.1237			14.3796	14.4644	14.3036	16.3986	14.4633			10.487	12.2987	11.5698	12.5392	12.0191
		15.261	14.7457	13.8023	12.9535	12.5348			3.6977	5.1231	3.8164	4.5943	5.2209			14.4643	14.9271	14.4644	16.6354	14.8724			10.8494	12.5349	11.9354	12.9528	12.2989
		15.5135	14.9267	14.024	13.4062	12.9521			3.7823	5.2205	3.9193	4.669	5.2632			14.9253	15.2612	14.9241	16.8074	15.209			11.095	12.9304	12.0178	13.2673	12.5343
		16.0446	15.5006	14.3862	13.6059	13.2673			3.8149	5.3066	3.9954	4.808	5.6246			15.2582	15.4816	15.2575	16.9887	15.4111			11.3882	13.2577	12.2986	13.4995	12.9314
		16.226	15.8672	14.4644	14.0252	13.4074			3.9178	5.5036	4.0523	4.9083	5.7385			16.0328	16.2265	15.6268	17.658	16.2263			11.7301	13.4067	12.3928	13.881	13.2644
		16.4028	16.0301	15.0396	14.3056	13.799			3.9957	5.6222	4.1755	4.989	5.8174			16.3985	16.3981	16.2286	17.8457	16.3996			11.9814	13.7962	12.5439	14.2942	13.4748
		16.8125	16.2267	15.2099	14.4641	14.0241			4.0519	5.8189	4.2957	5.1253	5.9794			16.8063	16.8062	16.3974	18.0428	16.8066			12.1703	14.0025	12.9521	14.4634	13.7985
		16.9905	16.4045	15.516	14.926	14.3049			4.176	5.9768	4.3423	5.2212	6.2896			16.9888	16.9889	16.8076	18.1574	16.9887			12.3866	14.3044	13.2637	14.7808	14.0247
		17.2423	16.6622	16.0293	15.0853	14.4645			4.297	6.0795	4.4307	5.3043	6.4196			17.2401	17.2443	16.8885	18.8451	17.2435			12.5379	14.4643	13.4077	15.0838	14.3771
		17.6702	16.8195	16.2264	15.5055	14.7547			4.3447	6.1794	4.5114	5.3623	6.5326			17.6716	17.6727	16.9917	19.0754	17.6754			12.9309	14.9229	13.7961	15.4082	14.4661
		18.0468	16.9881	16.4007	16.0442	15.0399			4.4292	6.2923	4.5909	5.5037	6.6243			17.8446	17.9307	17.6655	19.7248	17.8451			13.2569	15.2087	14.0016	15.6844	14.9243
		18.1562	17.5053	16.8117	16.2258	15.2587			4.5125	6.4344	4.6656	5.6225	6.6606			18.0424	18.1553	17.8458	19.8439	18.0443			13.4066	15.4853	14.3028	16.0294	15.2083
		18.537	17.6703	16.8877	16.3995	15.5046			4.5917	6.624	4.8072	5.7388	6.7645			18.1564	18.3906	18.0413	20.7469	18.1554			13.6049	15.8262	14.4644	16.2263	15.4848
		18.8527	17.8452	16.9926	16.6631	16.0332			4.6633	6.7682	4.9087	5.8276	6.8563			18.6033	18.8454	18.1552	20.9489	18.5385			13.9999	16.2008	14.9236	16.4062	15.8256
		19.0764	18.1559	17.6646	16.808	16.2274			4.8074	6.8568	4.9878	5.9809	7.0312			18.8455	19.0766	18.5381	21.0817	18.8455			14.2074	16.3998	15.2086	16.8045	16.0664
		19.7229	18.5362	17.8466	16.8889	16.4004			4.9091	6.9902	5.0375	6.1166	7.1351			19.0754	19.6331	18.8466	21.7785	19.0749			14.4159	16.6631	15.4818	16.9927	16.2279
		19.8258	18.8507	18.0742	17.0661	16.8059			4.9875	7.1354	5.1234	6.1814	7.2109			19.6345	19.825	19.0767	22.2452	19.7227			14.6603	16.8869	15.825	17.2528	16.6352
		20.4085	19.0765	18.1556	17.2541	16.8857			5.0389	7.2131	5.2208	6.2912	7.2836			19.8259	20.4153	19.5797	22.4565	19.826			14.9261	17.1939	16.0451	17.6563	16.8216
		20.7489	19.7246	18.537	17.6649	16.9916			5.1223	7.343	5.3058	6.4195	7.434			20.4156	20.7467	19.7207	23.0371	20.4135			15.2078	17.4828	16.2285	17.8442	17.052
		20.9482	19.8433	18.8529	17.8466	17.5035			5.2201	7.4342	5.4805	6.5323	7.4961			20.7477	20.9489	20.384	23.44	20.7479			15.4098	17.6706	16.4067	18.1539	17.2462
		21.0846	20.3951	19.0773	18.0752	17.6694			5.2623	7.4954	5.5336	6.6578	7.6246			20.948	21.0824	20.7465	23.7557	20.9483			15.684	17.849	16.7795	18.414	17.6617
		21.9586	20.747	19.7191	18.1573	17.848			5.5019	7.6242	5.6229	6.7643	7.7636			21.0824	21.7792	20.9491	24.2257	21.0812			15.8962	18.1535	16.9882	18.6561	17.8454
		22.144	20.9486	19.8416	18.5363	18.155			5.6228	7.7626	5.7399	6.8567	7.8598			21.9633	22.2439	21.0831	24.4527	21.8105			16.2176	18.5216	17.2431	18.97	18.1535
		22.3775	21.0823	20.4018	18.8533	18.5362			5.7387	7.8602	5.8234	6.9843	7.9134			22.2452	22.4555	22.0847	24.8093	22.1451			16.3988	18.658	17.6566	19.3469	18.4156
		22.557	21.7778	20.7458	19.0772	18.6576			5.818	7.915	5.9744	7.041	8.0613			22.4555	23.2201	22.2463	25.1764	22.4567			16.6641	18.8543	17.8444	19.6311	18.6541
		23.0551	21.9618	20.9485	19.634	18.849			5.867	8.0615	6.1156	7.135	8.1842			22.8154	23.4402	22.4562	25.4848	23.0383			16.8118	19.0764	18.1532	19.8243	18.9697
		23.7561	22.4558	21.7771	19.8239	19.0746			5.9747	8.1862	6.1776	7.2127	8.3471			23.4401	23.7561	23.0383	25.6672	23.4408			16.993	19.4582	18.5173	20.2416	19.3498
		23.9271	22.5585	21.9627	20.3838	19.7205			6.0735	8.3464	6.2891	7.4333	8.4562			23.7554	24.2259	23.4403	26.2122	24.2258			17.241	19.7188	18.6553	20.4128	19.631
		24.261	23.0418	22.3758	20.7478	19.8252			6.149	8.4575	6.3445	7.5726	8.8349			24.2262	24.4515	24.2248	26.3839	24.4521			17.6572	20.0055	18.8548	20.7471	19.8418
		24.3906	23.2177	22.5569	20.9483	20.4142			6.2899	8.5945	6.4323	7.6285	8.8759			24.453	24.8082	24.4499	26.7731	24.8085			17.8443	20.3824	19.0777	20.949	20.2437
		24.8079	23.4431	23.0473	21.0799	20.7473			6.4342	8.8341	6.4993	7.7636	9.0214			24.5503	25.1719	24.8087	27.0079	25.2034			18.0438	20.7439	19.354	21.4143	20.4137
		25.2045	23.7692	23.2643	21.9624	20.948			6.5278	8.8823	6.5331	7.8641	9.0907			24.8086	25.6244	25.201	27.6223	25.6249			18.1849	20.9474	19.7177	21.7539	20.7484
		25.6235	24.2627	23.4419	22.1452	21.0812			6.623	9.0237	6.6241	7.9162	9.187			25.6231	26.2138	25.6684	27.8408	26.2134			18.5359	21.3521	19.8462	21.9608	20.9495
		25.8942	24.3907	24.2293	22.4583	21.9616			6.6595	9.0907	6.6597	8.0613	9.3123			26.2102	26.3844	26.2118	28.155	26.3845			18.845	21.7258	20.2438	22.2442	21.4156
		26.3875	24.8085	24.3914	22.5556	22.1491			6.7648	9.1841	6.7655	8.1837	9.4384			26.3834	26.8752	26.3849	28.8773	26.7728			19.0729	21.9601	20.4145	22.4557	21.7771
		26.7781	25.2058	24.8077	23.0546	22.3751			6.8543	9.3119	6.8553	8.3462	9.5677			26.7722	27.1168	26.7722	29.0951	27.0083			19.3514	22.243	20.7489	22.8155	21.9661
		27.0033	25.6215	25.2033	23.2648	22.4585			6.9903	9.4403	6.988	8.4561	9.936			27.0049	27.6222	27.0046	29.646	27.1222			19.6304	22.4552	20.9489	23.0362	22.3096
		27.1258	26.2101	25.623	23.4409	22.557			7.1348	9.5888	7.0343	8.8347	10.0779			27.407	27.8407	27.1189	30.3652	27.6225			19.8246	22.8161	21.3653	23.3139	22.4584
		27.6211	26.6865	26.2094	23.9298	22.851			7.1599	9.936	7.1264	8.877	10.1762			27.6226	28.1573	27.6224	30.4909	27.84			20.155	23.0364	21.7247	23.7535	22.8478
		27.8434	26.9895	26.3868	24.2611	23.0439			7.2121	10.1801	7.1588	9.0191	10.2699			28.1544	28.2628	27.8444	31.218	28.1571			20.4012	23.3131	21.9459	23.9937	23.055
		28.154	27.1162	26.7825	24.391	23.4817			7.4327	10.269	7.2106	9.0901	10.3866			28.2633	28.4389	28.1482	31.3954	28.2625			20.746	23.7527	22.2434	24.2602	23.4408
		28.2625	27.6214	27.0014	24.808	23.9304			7.4961	10.3319	7.2824	9.1901	10.4821			28.8782	28.8788	28.2628	31.9149	28.88			20.943	23.9928	22.4559	24.4525	23.7552
		28.4345	27.8405	27.1204	25.4553	24.262			7.5716	10.3857	7.4322	9.3119	10.5234			29.0942	29.0948	28.8813	32.1902	29.0958			21.0838	24.229	22.8183	24.8057	23.9943
		28.8814	28.153	27.622	25.6252	24.391			7.6261	10.4573	7.5617	9.4627	10.6845			29.6456	29.3778	29.0952	32.5564	29.647			21.4179	24.4514	23.0425	25.1725	24.377
		29.0972	28.2625	27.8383	25.8935	24.8083			7.7631	10.9476	7.6255	9.565	10.9482			30.3638	29.6471	29.6458	33.1766	30.3634			21.7518	24.8065	23.3099	25.4208	24.8026
		29.8981	28.4371	27.9367	26.2109	25.2008			7.8587	11.0925	7.7626	9.936	11.0924			30.4906	29.8984	30.3649	33.397	30.491			21.9631	25.171	23.7535	25.6662	25.1715
		30.2068	28.8789	28.1551	26.3848	25.4643			7.9149	11.1907	7.8595	10.0599	11.1944			30.8183	30.3642	30.4914	34.0096	30.8182			22.1449	25.3713	23.9914	25.9777	25.4563
		30.3631	29.0951	28.2625	26.7782	25.6237			8.0608	11.3367	7.9137	10.1782	11.2792			31.1557	30.4918	30.8203	34.0946	31.2177			22.4544	25.625	24.2622	26.2109	25.666
		30.4957	29.8952	28.4353	26.8758	26.2105			8.184	11.5261	7.9715	10.2699	11.5249			31.2994	31.2171	31.2179	34.7	31.3958			22.5565	25.8948	24.4502	26.5924	25.9802
		30.8194	30.2038	28.8801	27.0062	26.3891			8.3467	11.7153	8.0624	10.3293	11.7154			31.4952	31.3025	31.3037	34.8937	31.8367			22.8487	26.2114	24.8065	26.8016	26.2124
		31.3966	30.3644	29.4879	27.1209	26.7733			8.4556	11.8686	8.1831	10.3864	11.9352			31.794	31.4954	31.4954	35.0743	32.063			23.0376	26.5925	25.0633	27.003	26.6733
		31.4959	30.4945	29.6456	27.622	26.9893			8.5663	11.9365	8.3025	10.4797	12.0167			32.5522	32.066	31.7938	36.1082	32.5543			23.2643	26.7739	25.2033	27.3378	26.8753
		31.8363	31.1554	29.8961	27.839	27.1251			8.8337	12.0849	8.348	10.5479	12.084			32.6765	32.2296	32.1912	36.2141	32.6789			23.481	27.0016	25.4604	27.6212	27.1186
		32.2274	31.2995	30.363	28.153	27.4995			8.8754	12.1729	8.4559	10.6847	12.1969			32.9583	32.5542	32.6752	36.8908	33.5457			23.7557	27.3381	25.6659	27.8409	27.4947
		32.6781	31.4928	30.4928	28.4127	27.6222			8.955	12.3528	8.4846	10.8506	12.3528			33.5486	32.6803	32.9567	37.2367	33.8616			24.1146	27.6208	26.0903	28.1487	27.8357
		33.2814	31.8352	30.8195	28.8773	27.8376			9.0883	12.4575	8.5917	10.9457	12.4912			34.0104	32.9584	33.5466	37.5216	34.0936			24.3746	27.8412	26.2822	28.4107	28.1479
		33.7403	32.2478	31.1588	29.0961	27.9379			9.1829	12.5359	8.7292	11.0921	12.5378			34.0949	33.7438	34.0082	37.9777	34.5257			24.551	28.1528	26.6717	28.7119	28.4119
		34.0407	32.6758	31.3029	29.3783	28.1549			9.3116	12.6386	8.8345	11.1898	12.6398			34.7021	34.0082	34.0943	38.2203	34.7018			24.8077	28.4033	26.8747	28.8797	28.7932
		34.3029	33.2812	31.4972	29.8653	28.2616			9.3636	12.6953	8.8751	11.2779	12.7445			34.896	34.0944	34.5146	38.6723	34.8928			25.172	28.782	27.0097	29.308	28.8885
		34.5258	33.7402	31.8324	30.2035	28.4351			9.4664	12.8374	9.0232	11.345	12.93			35.0741	34.7019	34.7038	39.2219	35.0757			25.3706	28.8828	27.3379	29.6452	29.3707
		34.8956	34.0356	32.1913	30.3559	28.8813			9.5679	12.9311	9.0902	11.5233	13.1354			36.1079	34.8941	34.8942	39.4639	35.7112			25.6228	29.3099	27.6215	29.8938	29.6459
		35.0747	34.0948	32.676	30.4908	29.0955			9.724	13.2271	9.1837	11.7162	13.3127			36.2118	35.0744	35.0751	39.8945	36.047			25.8557	29.6442	27.8404	30.204	29.894
		35.7112	34.8946	32.9823	30.8221	29.8937			9.819	13.4024	9.3109	11.9359	13.3654			36.8906	35.42	35.6859	40.2848	36.2115			26.2045	29.866	28.1541	30.3636	30.2094
		36.1117	35.0741	33.2826	31.2192	30.1916			9.9346	13.4761	9.4372	11.9824	13.4046			37.2369	36.108	36.1085	40.6508	36.8902			26.3839	30.1876	28.4145	30.8169	30.3651
		36.2132	35.7087	33.7412	31.3978	30.3556			10.0771	13.5728	9.5095	12.0187	13.4747			37.8562	36.8904	36.2125	40.9609	37.2373			26.6855	30.3646	28.7497	31.1425	30.8171
		36.8922	36.0815	34.0416	31.8346	30.4917			10.178	13.6605	9.586	12.0856	13.5716			38.2203	37.2368	36.8903	41.185	37.5217			26.8756	30.4987	28.8818	31.2999	31.1547
		36.9808	36.2121	34.0964	32.2287	30.8177			10.2169	13.7978	9.8103	12.2827	13.6611			38.6026	37.5209	37.1941	42.0403	38.2187			27.0026	31.032	29.0992	31.7913	31.3987
		38.0788	36.8893	34.7666	32.6769	31.2995			10.2691	14.0011	9.9361	12.3877	13.8816			38.6768	37.9745	37.5224	42.2057	38.603			27.3374	31.2166	29.4869	31.9146	31.7923
		38.2185	36.9813	34.895	33.0363	31.3992			10.331	14.3763	10.0406	12.4955	14.0011			39.0108	38.3179	37.975	42.2867	38.6738			27.6198	31.4937	29.8522	32.1901	32.0649
		38.6726	37.2394	35.0747	33.7423	31.5007			10.3853	14.4616	10.1789	12.5374	14.0843			39.4644	38.6049	38.2191	42.6503	39.4634			27.8395	31.8265	30.1883	32.4897	32.2464
		39.2338	37.9767	36.1075	34.035	31.8297			10.4805	14.6251	10.2686	12.6933	14.2105			39.8913	38.9224	38.6064	42.9332	40.1101			28.1473	32.1374	30.3646	32.679	32.6744
		39.4996	38.2209	36.2121	34.0945	32.2292			10.5503	14.6629	10.3295	12.8365	14.304			40.172	39.4636	38.6752	43.3573	40.2802			28.2648	32.2465	30.677	33.0338	32.9565
		40.1113	38.6731	36.8894	34.3401	32.5561			10.6756	14.749	10.3861	12.9299	14.3761			40.9592	40.1712	39.4651	43.7744	40.6483			28.4344	32.5535	31.0328	33.281	33.2804
		40.6506	39.2333	36.9772	34.893	32.6781			10.8545	14.8709	10.4794	13.1356	14.4601			41.1819	40.6483	40.1693	44.4615	40.9606			28.7949	32.9548	31.2982	33.6729	33.6035
		40.9664	39.505	37.2365	35.0254	33.2819			10.9478	14.9208	10.5215	13.4034	14.6216			41.6291	40.9604	40.2832	44.6029	41.6284			28.8867	33.1753	31.4975	34.0078	34.0072
		41.2113	40.2787	37.9755	35.7454	33.6001			11.0922	15.032	10.6117	13.4753	14.7062			42.0431	41.1848	40.6502	44.9036	42.0407			29.3094	33.5446	31.8292	34.0941	34.0938
		42.0442	40.6456	38.2199	35.9678	33.7415			11.1919	15.2095	10.6839	13.5715	14.8719			42.2843	42.0425	40.9597	45.63	42.206			29.4902	33.7388	32.1888	34.5212	34.5239
		42.205	40.9616	38.6034	36.1093	34.0346			11.3329	15.4811	10.8489	13.6615	14.9209			42.6498	42.2845	41.1839	45.8103	42.2874			29.8597	34.0344	32.4175	34.7655	34.8925
		42.6476	41.0773	38.6737	36.2127	34.0946			11.3887	15.5711	10.9479	13.7952	15.0819			43.2585	42.5786	41.6301	45.9673	42.6502			30.0959	34.3014	32.678	34.9649	35.0741
		43.3573	41.2092	39.2402	36.8896	34.3383			11.5254	15.7216	11.0926	13.885	15.2084			43.3594	42.652	42.0407	46.9126	42.9332			30.3436	34.6993	32.9824	35.0758	35.4844
		43.4756	42.043	39.5025	36.9797	34.8939			11.7161	15.8236	11.1891	14.0007	15.2571			43.7098	43.1629	42.2081	47.0803	43.3574			30.4941	34.8945	33.1761	35.6105	35.7461
		43.7734	42.2045	40.2793	37.237	35.0728			11.9339	15.9887	11.2758	14.148	15.4111			43.7793	43.3598	42.2901	47.5262	43.7116			30.8172	35.0734	33.5442	35.9538	36.0821
		44.2256	42.2867	40.4809	37.5222	35.7111			11.9807	16.2001	11.3446	14.3038	15.4809			44.4608	43.7745	42.5776	47.9054	43.7768			31.1456	35.4202	33.7439	36.1089	36.4491
		44.6007	42.6478	40.6512	37.9754	36.084			12.0172	16.3953	11.5255	14.3761	15.5771			44.6023	44.4602	42.9333	48.1069	44.5577			31.2993	35.7418	34.0349	36.4579	36.8539
		44.904	42.9321	40.9981	38.2215	36.2109			12.0847	16.4432	11.5809	14.4593	15.6273			44.9741	44.6006	43.2597	48.429	44.9036			31.4964	36.0452	34.2708	36.8536	36.9766
		45.6372	43.2575	41.2082	38.6081	36.8898			12.1962	16.6298	11.7174	14.5496	15.7313			45.4896	44.9026	43.7751	48.9214	45.2741			31.7933	36.2119	34.5132	36.9736	37.3426
		45.7214	43.7743	41.6792	39.1705	36.976			12.299	16.7765	11.9349	14.626	15.8239			45.8114	45.2742	44.4598	49.2626	45.6405			32.0617	36.7016	34.765	37.3411	37.7589
		45.964	44.1637	42.0452	39.4649	37.2366			12.353	16.8065	11.9809	14.745	15.9879			45.9653	45.6307	44.5996	49.5686	45.8095			32.2284	36.8885	35.0218	37.7278	38.0685
		46.2007	44.6042	42.2046	40.207	37.5218			12.3911	16.8688	12.0176	14.8704	16.2064			46.19	45.81	44.9048	50.163	46.1908			32.5525	37.2355	35.3892	37.9766	38.315
		47.5243	44.73	42.5767	40.4799	38.0682			12.4931	16.9873	12.0849	14.9217	16.3963			46.9126	46.1906	45.2737	50.642	46.9132			32.8583	37.4844	35.6122	38.2188	38.6038
		47.7207	45.2739	42.6503	40.6482	38.2193			12.5344	17.3849	12.1319	15.0286	16.4428			47.6166	46.3782	45.8093	51.3012	47.5908			33.0361	37.7656	35.9669	38.4982	39.0114
		48.1091	45.64	42.9329	40.9603	38.6728			12.6938	17.6571	12.2435	15.083	16.6288			47.9036	46.9116	45.9641	51.4874	47.7202			33.2826	37.9748	36.1098	38.6743	39.3427
		48.4311	45.8128	43.475	41.1849	39.1675			12.8364	17.7179	12.2992	15.2109	16.7739			48.1086	47.5236	46.1898	51.9627	48.1076			33.5484	38.2193	36.5678	39.1605	39.752
		49.2331	45.9653	43.7743	41.5858	39.4643			12.9303	17.8458	12.3514	15.2576	16.8069			48.3635	47.7198	46.379	52.3197	48.4307			33.7414	38.4983	36.8549	39.463	40.1065
		49.274	46.1977	44.2242	42.0421	39.8933			12.956	17.9292	12.3882	15.4107	16.8699			49.1133	48.1068	46.9123	52.5509	49.1116			34.0173	38.6736	36.9792	39.7721	40.2805
		49.7297	46.9144	44.3494	42.2067	40.2808			13.136	18.0406	12.4944	15.4819	16.9591			49.2618	48.4351	47.5537	52.8278	49.2619			34.0946	39.0965	37.2376	40.1081	40.647
		50.1658	47.5239	44.599	42.2858	40.6452			13.4027	18.0753	12.5357	15.7251	16.9885			49.565	48.6926	47.7196	53.2829	49.5647			34.5133	39.4606	37.5213	40.284	40.9604
		50.3291	47.6161	44.9737	42.6494	40.9591			13.4768	18.1539	12.6385	15.8243	17.1583			49.9455	49.2608	48.1068	53.4349	50.1631			34.7669	39.7692	37.8561	40.6469	41.2091
		50.656	48.1083	45.6396	43.1648	41.0716			13.5707	18.3883	12.6934	15.9881	17.3821			50.332	49.564	48.4271	54.1929	50.6413			35.0709	40.0011	38.2164	40.9614	41.5851
		51.1139	48.429	45.8132	43.2585	41.631			13.6036	18.5041	12.8374	16.203	17.6569			50.6409	49.7324	48.9208	54.5658	51.184			35.2933	40.2779	38.4564	41.1829	42.0382
		51.9591	48.5669	45.9651	43.3586	42.0434			13.662	18.6039	12.9296	16.3954	17.7193			51.047	50.1646	49.2339	54.7665	51.3164			35.5003	40.6447	38.6735	41.5846	42.2065
		52.1178	49.2322	46.1984	43.7743	42.2055			13.797	18.8421	12.9555	16.4431	17.8447			51.3893	50.641	49.4548	55.1809	51.4859			35.7427	40.9597	39.0927	41.9493	42.5754
		52.3196	49.2751	46.9126	44.2219	42.2904			13.8834	18.9125	13.1353	16.6332	17.9295			52.0333	51.1127	49.5663	55.9317	52.0356			36.1067	41.1826	39.4622	42.0903	42.9305
		52.5529	49.46	47.5256	44.3469	42.5781			14.0004	19.0665	13.2564	16.7738	18.0387			52.2266	51.4854	49.946	56.2576	52.32			36.4067	41.5845	39.7522	42.5466	43.2574
		53.2828	49.729	47.6178	44.7274	42.651			14.112	19.2838	13.3123	16.807	18.1335			52.5504	51.9724	50.6404	56.4917	52.5523			36.7803	41.7772	40.1084	42.651	43.4737
		53.5442	50.1622	47.7227	44.9034	42.9348			14.2075	19.3511	13.4028	16.8849	18.237			52.8277	52.3189	51.1158	56.9646	52.8282			36.8934	42.048	40.4275	43.0479	43.7738
		53.6796	50.3303	48.1117	45.0154	43.2588			14.296	19.4222	13.4736	16.9866	18.3286			53.1179	52.5521	51.3004	57.6922	53.2831			37.2355	42.2834	40.6494	43.2586	44.1299
		54.2309	51.114	48.4323	45.2728	43.711			14.3754	19.5764	13.5718	17.1091	18.3889			53.2829	52.8274	51.9607	58.0914	53.5444			37.4822	42.5753	40.96	43.466	44.3468
		54.5904	51.3007	48.5684	45.6409	43.7761			14.4584	19.634	13.6044	17.1575	18.8436			53.4354	53.2829	52.2255	58.7366	54.1917			37.8546	42.9307	41.1826	43.7735	44.6815
		54.7668	51.9711	49.0199	45.8113	44.2235			14.5494	19.7043	13.6649	17.2403	18.9373			54.2305	53.435	52.322	59.231	54.7641			38.0721	43.1638	41.5827	44.1296	44.9078
		54.8821	52.3183	49.2595	45.9662	44.4606			14.6195	19.8251	13.7949	17.3833	19.0674			54.5634	54.1911	52.5529	59.379	55.1807			38.3162	43.357	41.7774	44.3009	45.2774
		55.3125	52.5499	49.4614	46.1987	44.9021			14.6615	19.9354	13.8837	17.6574	19.2216			54.7658	54.7639	52.8282	59.7273	55.7453			38.5509	43.7129	42.0477	44.5991	45.638
		55.9159	52.712	49.722	46.5287	45.0177			14.745	20.0065	13.9995	17.7183	19.2829			55.1797	55.18	53.2822	60.0034	55.9318			38.675	43.7784	42.2832	44.9032	45.9626
		56.2616	52.9008	50.164	46.9141	45.639			14.8728	20.1549	14.0839	17.8445	19.353			55.7432	55.743	53.5453	60.1875	56.2582			39.0106	44.1643	42.5755	45.2716	46.202
		56.6227	53.2823	50.3311	47.5511	45.811			14.9219	20.384	14.2047	17.9299	19.4622			55.9329	55.9317	54.0145	60.4171	56.6081			39.2215	44.3457	42.8158	45.6314	46.5285
		56.9632	53.6786	51.115	47.7191	45.9644			15.0123	20.4787	14.2926	18.0406	19.5757			56.2561	56.3602	54.2317	61.5855	57.1688			39.465	44.679	43.1624	45.8097	46.9098
		57.237	53.7636	51.3923	47.9332	46.1982			15.081	20.5114	14.3773	18.0748	19.6329			56.6081	56.6103	54.5643	61.9321	57.6925			39.7722	44.904	43.3568	46.1873	47.1388
		57.8761	54.5654	51.9696	48.1084	46.7934			15.208	20.6511	14.4198	18.1533	19.7226			56.967	56.9672	54.7656	62.2655	58.0909			40.1072	45.2732	43.7088	46.5273	47.5233
		58.0978	54.7646	52.1184	48.4343	46.9776			15.2576	20.7459	14.4614	18.2397	19.8245			57.2022	57.2393	55.5343	62.8154	58.9414			40.2794	45.6286	43.7776	46.7893	47.7219
		58.7341	54.8808	52.3182	48.9628	47.5256			15.4086	20.832	14.5454	18.3285	19.9344			57.6917	57.6918	55.932	63.3494	59.2306			40.6465	45.8081	44.1631	47.0769	48.1066
		59.232	55.9308	52.5506	49.1755	47.6153			15.4813	20.9423	14.6606	18.3896	20.0068			57.8763	58.0919	56.2572	63.7305	59.3782			40.9599	46.1868	44.3444	47.4645	48.4264
		59.3793	56.1341	52.8282	49.2609	47.7264			15.6256	21.0807	14.7433	18.5198	20.1542			58.0918	58.9401	56.3612	64.2445	59.9596			41.1795	46.5267	44.5985	47.6142	48.6917
		59.738	56.3614	53.2839	49.7247	47.9058			15.7249	21.1851	14.8722	18.603	20.3847			58.6076	59.2292	56.6102	64.4977	60.1863			41.5653	46.7866	44.9036	47.9048	48.9639
		60.0045	56.9551	53.679	50.1625	48.1087			15.8241	21.5124	14.9224	18.7345	20.478			59.0502	59.3789	57.2023	64.6706	60.4168			41.7633	46.9771	45.271	48.2134	49.2607
		60.1869	57.2371	53.9991	50.3297	48.4331			15.8676	21.749	15.028	18.843	20.5731			59.3288	59.7289	57.6927	64.9557	60.6568			42.0426	47.4204	45.6275	48.4358	49.566
		60.419	58.0932	54.5624	51.0431	48.567			15.9885	21.884	15.082	18.9375	20.7468			59.3816	60.0048	58.0918	65.4952	61.5855			42.2061	47.5885	45.8095	48.6935	49.9435
		61.6157	58.229	54.7668	51.1809	48.9207			16.2032	22.079	15.2082	19.0649	20.8328			59.9573	60.1907	58.4073	65.8136	61.8826			42.5744	47.8951	46.0493	48.9608	50.1621
		61.8804	58.7212	54.8794	51.3172	49.1127			16.3953	22.2425	15.2575	19.2813	20.948			60.1878	60.4169	59.0519	66.1846	62.3195			42.8594	48.108	46.5121	49.2357	50.5637
		61.9772	59.0504	55.0484	51.4888	49.2594			16.4417	22.3092	15.3276	19.3532	21.0804			60.4171	61.5854	59.2324	66.3221	62.8151			43.1633	48.4248	46.7885	49.4641	50.9914
		62.5445	59.3788	55.3116	51.9608	49.4567			16.6283	22.4549	15.4093	19.4199	21.1876			60.9841	61.9317	59.3785	66.4587	63.4015			43.3565	48.6906	47.0777	49.7289	51.18
		62.8166	59.6663	55.9309	52.1189	49.7301			16.665	22.5536	15.4802	19.5771	21.4167			61.5855	62.6613	59.7275	67.083	63.7278			43.7082	48.9481	47.4635	50.0428	51.4874
		63.4013	60.0014	56.1335	52.3189	49.9469			16.7649	22.6487	15.5685	19.6317	21.5105			61.9317	62.8149	60.0044	67.3772	64.1525			43.7769	49.2329	47.6103	50.3272	51.9328
		63.7316	60.188	56.2607	52.5508	50.1635			16.8056	22.8144	15.6274	19.7066	21.6689			62.1312	63.3493	60.1892	67.8001	64.4972			44.1628	49.2746	47.9054	50.6409	52.115
		64.1497	60.418	56.9622	52.831	50.6436			16.8857	23.0012	15.7306	19.8242	21.809			62.4814	63.7319	60.4162	67.9115	64.6692			44.3489	49.7196	48.1105	50.9967	52.3204
		64.5	61.5867	57.2342	53.2821	51.1151			16.9863	23.0395	15.8262	20.0046	21.8851			62.8147	64.0314	61.5854	68.4602	64.9578			44.5983	50.0424	48.4241	51.1803	52.6984
		64.6686	61.8821	57.4846	53.4354	51.1831			17.0497	23.2192	15.9883	20.0346	21.949			63.349	64.2423	61.9308	68.7219	65.496			44.9028	50.1641	48.6907	51.486	52.8997
		65.3151	61.9789	58.0917	53.6802	51.3157			17.1795	23.2652	16.2001	20.1578	22.0809			63.7312	64.4967	62.1332	69.1949	65.8144			45.0831	50.5453	48.9226	51.8254	53.2821
		65.8216	62.4871	58.3134	54.0131	51.971			17.2391	23.44	16.2289	20.3854	22.1434			63.886	64.6704	62.417	69.3924	66.0239			45.4424	50.9019	49.2325	52.0352	53.5457
		66.1908	62.8178	58.7547	54.2337	52.2265			17.382	23.4829	16.3951	20.4793	22.2428			64.1499	64.9563	62.8148	69.5783	66.2833			45.6396	51.1132	49.4554	52.3182	53.7627
		66.2831	63.3996	59.05	54.5667	52.32			17.474	23.605	16.4428	20.571	22.3074			64.4967	65.4943	63.4043	70.0619	66.4581			45.8112	51.3896	49.7261	52.554	54.1907
		66.459	63.7315	59.378	54.7656	52.5526			17.6501	23.7553	16.5384	20.6521	22.4546			64.9556	65.8202	63.7286	70.4185	67.0818			46.0505	51.7986	50.0431	52.8304	54.4869
		67.0812	63.8847	59.7353	55.3115	52.8289			17.7183	23.9204	16.6309	20.7462	22.5195			65.3143	66.1858	64.1525	70.587	67.3758			46.2006	51.9731	50.3215	53.2348	54.7624
		67.3759	64.1521	59.9575	55.7439	53.2824			17.846	24.2215	16.7737	20.9083	22.558			65.4941	66.3215	64.3703	70.6926	67.7982			46.528	52.2649	50.5694	53.4569	55.0356
		67.8	64.4996	60.1853	55.931	53.4359			17.9285	24.265	16.8061	20.9426	22.6463			66.0228	66.4609	64.4975	71.3329	68.462			46.7892	52.5497	50.9083	53.6796	55.3102
		67.9099	64.6678	60.4159	56.2588	53.6689			18.0406	24.376	16.8847	21.0811	22.8154			66.2848	67.0832	64.6688	71.6425	68.7206			46.9788	52.8274	51.0454	54.0036	55.7425
		68.4627	64.9673	61.5112	56.4916	54.0004			18.0776	24.4465	16.9861	21.188	23.0015			66.4584	67.3776	64.9584	71.7631	69.3921			47.4611	53.1177	51.3014	54.3753	55.9301
		69.0424	65.3145	61.6307	56.6229	54.1931			18.1546	24.5501	17.0519	21.4157	23.2174			67.0818	67.9106	65.3185	72.8794	69.5774			47.5905	53.4335	51.4865	54.5729	56.2588
		69.3783	65.8134	61.8821	56.9646	54.5697			18.2387	24.8072	17.1553	21.5111	23.4394			67.7986	68.3312	65.4969	73.1199	69.6863			47.8934	53.6796	51.9598	54.7673	56.6078
		69.5793	66.2856	61.9802	57.2387	54.7661			18.3318	24.9919	17.2331	21.7759	23.4822			67.913	68.4642	65.816	73.9445	70.0639			48.1065	54.0016	52.1156	55.0451	56.953
		69.6837	66.457	62.1306	57.5102	54.8794			18.4162	25.1135	17.3192	21.8861	23.6037			68.462	68.7226	66.2826	74.3184	70.4191			48.3629	54.2312	52.3191	55.3663	57.234
		70.0606	66.8615	62.5435	57.6932	55.0457			18.5225	25.171	17.3827	21.9449	23.7544			68.7205	69.1937	66.4587	74.9473	70.5889			48.5635	54.5616	52.5545	55.743	57.5151
		70.4215	67.0824	62.8157	58.2307	55.3106			18.6027	25.2431	17.4912	22.0804	24.1738			68.8569	69.3924	67.0824	75.2304	70.9674			48.92	54.7662	52.83	55.9309	57.8727
		70.588	67.3806	63.1577	58.733	55.7433			18.6607	25.3365	17.6494	22.143	24.2247			69.0445	69.58	67.3765	75.4955	71.3356			49.1144	55.0444	53.1826	56.259	58.0941
		70.6922	67.798	63.3995	59.0496	55.9315			18.8439	25.5946	17.7172	22.2393	24.376			69.5725	69.686	67.7979	76.0094	71.7624			49.263	55.3107	53.4339	56.6063	58.4078
		71.6526	67.9305	63.8321	59.2313	56.2572			18.9382	25.6646	17.7505	22.3088	24.4505			69.9731	69.9725	68.3317	76.3464	72.087			49.5645	55.6263	53.679	56.9527	58.7224
		71.7623	68.4627	64.1497	59.3772	56.3593			19.0663	25.751	17.8102	22.3736	24.7231			70.4186	70.4188	68.4634	76.714	72.8769			49.8481	55.9151	53.9949	57.2335	59.0471
		72.0857	68.7217	64.3717	59.5019	56.6115			19.2824	25.8167	17.8457	22.4549	24.808			70.5873	70.5878	68.7214	77.015	73.1205			50.1584	56.1789	54.2427	57.5145	59.3771
		72.5577	69.0428	64.4991	59.7381	56.9667			19.3504	25.9575	17.929	22.5542	24.9901			70.691	70.9671	69.393	77.1302	73.9453			50.3308	56.3571	54.5619	57.8098	59.6669
		72.8788	69.3915	64.669	60.0035	57.2385			19.4639	26.2803	18.0377	22.6494	25.0345			70.9687	71.2472	69.577	77.6952	74.3189			50.6421	56.6784	54.7664	58.0913	59.9539
		73.8499	69.5767	64.9577	60.1863	57.4837			19.575	26.3345	18.1529	22.8147	25.1701			71.6421	71.7607	69.6846	78.1652	74.9484			50.9933	56.9532	55.0862	58.3092	60.1866
		73.9471	69.6832	65.3173	60.4168	57.6937			19.6318	26.3823	18.2398	22.9578	25.2444			71.8833	71.9127	69.9717	78.6546	75.2318			51.1813	57.2355	55.3111	58.7186	60.4192
		74.3184	70.0588	65.8209	61.4005	57.8749			19.7053	26.4872	18.3446	23.0045	25.3371			72.3133	72.0894	70.4187	78.9157	75.6917			51.391	57.5145	55.5787	58.9484	60.9051
		74.9482	70.4197	66.1844	61.8726	58.0946			19.8228	26.6722	18.3909	23.2151	25.4575			72.462	72.4629	70.5875	79.0669	76.009			51.8239	57.694	55.9265	59.232	61.2722
		75.2328	70.5898	66.2853	61.9775	58.4128			19.8439	26.77	18.5057	23.264	25.6156			72.8808	72.8795	70.6906	79.2265	76.3467			51.9734	58.0903	56.1835	59.3801	61.5846
		76.0102	71.0106	66.4598	62.1316	58.738			19.9428	26.8742	18.5385	23.4392	25.6656			73.1194	73.1201	71.1436	79.8809	76.5824			52.2245	58.3092	56.3595	59.7261	61.8804
		76.345	71.3803	67.0813	62.4797	59.2307			20.0341	26.9606	18.6018	23.4809	25.8151			73.9449	73.9448	71.7623	80.4768	76.7147			52.5498	58.6419	56.6107	59.9577	62.1312
		76.7134	71.7633	67.375	62.8178	59.3778			20.156	27.1143	18.6572	23.6063	25.8945			74.2233	74.2859	71.9127	80.6289	77.0154			52.8272	58.9386	56.9527	60.1882	62.4782
		77.0147	71.9124	67.7124	63.3988	59.726			20.4024	27.4079	18.7351	23.7549	25.96			74.4755	74.4772	72.0898	81.5455	77.3955			53.1146	59.2297	57.2335	60.4181	62.8142
		77.129	72.2558	67.9102	63.7317	59.9578			20.5088	27.6133	18.8432	23.9271	26.1457			74.756	74.9477	72.4592	82.1119	77.6954			53.2852	59.3813	57.514	60.9019	63.0842
		77.4632	72.462	68.4628	63.8832	60.119			20.6512	27.6951	18.9366	24.1729	26.2113			75.1936	75.2296	72.8794	82.3811	78.0506			53.6626	59.6496	57.8169	61.2708	63.3988
		77.6926	72.8794	68.7207	64.1499	60.1899			20.7461	27.841	19.0152	24.2226	26.2806			75.4959	75.4944	73.1209	82.5868	78.6713			53.9664	59.9546	58.0925	61.5585	63.7307
		78.6662	73.126	69.0425	64.3854	60.4168			20.9404	27.9331	19.0724	24.2596	26.334			76.0097	76.0098	73.9467	83.1106	78.9223			54.1908	60.1847	58.3084	61.8707	64.1475
		78.9151	73.8475	69.3868	64.5744	61.3685			21.0564	28.1415	19.2181	24.3765	26.3818			76.3456	76.3465	74.2246	83.6632	79.2233			54.4686	60.4164	58.6432	61.9792	64.3838
		79.0709	73.9472	69.5773	64.6701	61.5847			21.0837	28.22	19.2829	24.4498	26.4887			76.7135	76.7147	74.4777	83.8322	79.3495			54.7611	60.7877	58.9398	62.3151	64.6675
		79.8816	74.3187	69.6824	65.3162	61.8856			21.1911	28.259	19.3509	24.7227	26.6718			77.0141	77.0149	74.9485	84.2784	79.882			54.8973	61.1015	59.2304	62.5324	64.9577
		80.1153	74.3913	70.0608	65.6989	61.9785			21.248	28.4037	19.4609	24.7802	26.7705			77.1307	77.1304	75.2311	84.5571	80.6225			55.1801	61.3973	59.3787	62.8174	65.3117
		80.6251	74.9509	70.2851	65.8149	62.1308			21.4168	28.5363	19.5765	24.9902	26.874			77.4642	77.466	75.6926	84.9722	80.8754			55.4187	61.5859	59.7251	63.1545	65.6601
		81.545	75.2331	70.4204	66.1868	62.418			21.5132	28.6191	19.6335	25.1711	26.9378			78.2902	77.697	76.0097	85.4092	81.5467			55.7421	61.8809	59.9564	63.4015	65.8201
		81.8693	75.5596	70.5922	66.2846	62.5447			21.7785	28.7113	19.7194	25.2436	26.9902			78.7452	78.495	76.3458	85.6953	82.1115			55.9308	61.9817	60.186	63.7302	66.1851
		82.1108	76.0125	70.7839	66.4325	62.8168			21.8861	28.7804	19.8238	25.3349	27.1147			79.0648	78.9159	76.7142	85.8027	82.3809			56.2572	62.3174	60.4176	64.1486	66.3199
		82.5276	76.348	71.0074	67.0813	63.3993			21.9424	28.8771	19.9343	25.596	27.4062			79.2254	79.2236	77.0142	86.0722	82.5883			56.6069	62.5291	60.787	64.3688	66.7216
		83.0506	76.6389	71.2461	67.3749	63.7311			22.0811	29.0263	20.007	25.6655	27.4819			79.8805	79.8807	77.1301	86.1729	83.5185			56.8846	62.8166	61.2208	64.6674	67.0809
		83.4162	77.0139	71.7658	67.7137	63.8849			22.1248	29.0941	20.118	25.8148	27.5681			80.574	80.476	77.4629	86.7055	83.6652			56.9685	63.157	61.5109	64.9567	67.3768
		83.5165	77.1304	71.9133	67.9102	64.1503			22.2423	29.3059	20.2438	25.8918	27.6246			80.8753	80.8747	77.6955	86.9677	84.1612			57.2379	63.3995	61.8269	65.2827	67.7126
		84.2772	77.4639	72.085	68.0965	64.4992			22.3077	29.5379	20.383	25.9579	27.6957			81.0714	81.4146	78.2908	87.6924	84.279			57.5134	63.7276	61.9732	65.4952	67.9107
		84.5572	77.6955	72.461	68.3325	64.6685			22.3736	29.6108	20.4777	26.1457	27.788			81.549	81.5477	78.6575	87.9762	84.5569			57.8081	63.8847	62.3425	65.8127	68.2991
		84.742	77.8358	72.8788	68.4632	64.9558			22.4546	29.6469	20.6505	26.2117	27.8408			82.1113	82.1119	79.1222	88.1653	84.9717			58.0911	64.1513	62.5284	66.1836	68.4652
		84.9722	78.6697	73.9418	68.7229	65.3155			22.5195	30.0446	20.7451	26.2808	28.1414			82.3818	82.3814	79.2256	88.5811	85.408			58.3074	64.4959	62.8172	66.2858	68.7231
		85.3316	78.9185	74.0239	69.0516	65.8146			22.5544	30.1871	20.7784	26.3322	28.2188			82.5874	82.587	79.8813	88.7081	85.6967			58.7191	64.6685	63.1567	66.4605	69.0422
		85.4144	79.0651	74.3185	69.3917	66.0214			22.65	30.3654	20.8368	26.3829	28.2602			82.9042	82.9054	80.6216	89.6563	86.0707			59.0309	64.9568	63.4003	66.8597	69.375
		86.0067	79.2237	74.3885	69.5775	66.1877			22.8142	30.4894	20.9051	26.4918	28.5353			83.5175	83.665	81.0719	90.0935	86.1727			59.2299	65.3092	63.73	67.0833	69.6803
		86.1728	79.5424	74.6581	69.6826	66.2852			22.8989	30.7989	20.9424	26.6738	28.6172			83.665	83.8326	81.548	90.8223	86.966			59.3782	65.6594	64.1206	67.3762	69.9917
		86.7083	80.1143	74.9509	69.9933	66.4588			23.0024	31.0321	21.0777	26.7712	28.7141			83.9637	84.2784	81.8701	90.9273	87.7225			59.7256	65.8175	64.368	67.7121	70.2728
		86.9673	80.6261	75.2326	70.2835	67.0814			23.214	31.2148	21.1874	26.8743	28.8243			84.2777	84.5592	82.1127	91.4106	87.9772			59.9995	66.1829	64.5738	67.9114	70.5862
		87.9772	80.8733	75.6932	70.4201	67.2841			23.2641	31.2992	21.3545	26.9625	28.8814			84.5572	84.9354	82.3811	92.0048	88.5801			60.1861	66.3195	64.9549	68.2985	70.7793
		88.1378	81.5477	76.0106	70.5874	67.3773			23.4399	31.3938	21.4173	27.0029	28.8815			84.9716	85.3327	82.5868	92.3366	88.7057			60.4184	66.4617	65.2771	68.4645	71.0114
		88.5814	81.7883	76.3464	70.6912	67.697			23.4815	31.4855	21.4688	27.1149	28.8817			85.3239	85.6972	83.1097	92.626	89.5553			60.851	66.8615	65.4985	68.7225	71.5636
		88.7084	82.1416	76.6383	70.7828	67.8013			23.6026	31.6115	21.6653	27.1556	29.0263			85.6973	86.0698	83.5181	92.9235	89.6589			61.2193	67.0842	65.7923	69.0432	71.7614
		89.144	82.3821	77.0136	71.2469	67.9115			23.7541	31.7926	21.778	27.4089	29.093			86.0707	86.1729	83.9644	93.1875	90.2182			61.5091	67.3748	66.0246	69.3869	72.0839
		89.5543	82.5893	77.1297	71.6539	68.4625			23.8692	31.8366	21.8867	27.5679	29.3045			86.1725	86.9662	84.1617	93.3987	90.652			61.7567	67.6564	66.2821	69.6821	72.4588
		89.6606	83.0508	77.3968	71.7625	68.7196			23.9263	31.9084	21.9637	27.6229	29.4639			86.706	87.3618	84.28	93.9496	90.9256			61.9316	67.9102	66.4581	69.9892	72.8779
		90.2172	83.5173	77.6953	71.9138	68.8069			24.1728	31.9922	22.0819	27.6921	29.6448			86.9663	87.9773	84.5585	94.1894	91.055			62.1318	68.2987	66.8607	70.2723	73.1299
		90.6536	83.6625	78.049	72.0874	69.0425			24.2226	32.0618	22.126	27.8365	29.8967			87.9764	88.165	84.9703	94.7816	91.4778			62.4157	68.4638	67.0827	70.5352	73.4772
		90.9253	83.8853	78.2909	72.4589	69.3888			24.3748	32.139	22.2409	28.142	29.9933			88.1321	88.5803	85.4077	95.0221	92.0102			62.5448	68.7223	67.3767	70.7625	73.8403
		91.0574	84.2798	78.6714	72.8792	69.5774			24.4455	32.1908	22.3082	28.2203	30.0952			88.58	88.7079	85.6974	95.6743	92.6323			62.8142	69.0418	67.6967	70.9668	73.9528
		91.4787	84.5567	78.9213	73.1247	69.6822			24.5077	32.49	22.3774	28.2595	30.188			88.7078	89.3223	86.0041	96.0006	92.9239			63.1469	69.3761	67.9099	71.2458	74.3191
		92.0183	84.7418	79.064	73.7989	69.9925			24.5503	32.553	22.4547	28.3804	30.2448			89.3241	89.6574	86.1725	96.5146	93.3957			63.3986	69.5786	68.329	71.6718	74.657
		92.6295	84.9722	79.2241	73.9447	70.2954			24.7232	32.6178	22.5205	28.6154	30.489			89.6571	90.2551	86.7073	96.7933	93.951			63.7289	69.9381	68.4666	71.9118	74.9483
		92.7447	85.4087	79.6388	74.3192	70.4205			24.8059	32.6754	22.554	28.7119	30.6115			90.2171	90.6526	86.9678	96.9391	94.1885			63.8851	70.0621	68.7245	72.2857	75.2596
		92.9299	85.8038	79.882	74.6574	70.5869			24.9918	32.8611	22.6462	28.824	30.7981			90.6545	90.9254	87.7205	97.3428	94.7826			64.1494	70.4039	69.0418	72.4597	75.605
		93.6044	86.0695	80.6255	74.9475	70.783			25.1704	32.9563	22.8151	28.8804	30.9214			90.9252	91.0577	87.9773	97.9548	95.0224			64.3713	70.5874	69.3757	72.8778	75.937
		93.8524	86.1734	80.8983	75.2296	71.0065			25.2429	33.2511	22.8979	29.0269	31.0326			91.0567	91.4786	88.1646	98.2318	95.3532			64.573	70.7822	69.5782	73.1219	76.1875
		94.1881	86.7065	81.5473	76.0097	71.2539			25.3356	33.3902	23.0022	29.0932	31.1461			91.4789	92.0041	88.5822	98.3496	95.6775			64.8435	71.0116	69.9713	73.4389	76.4314
		94.7846	87.5957	81.7902	76.103	71.6542			25.4196	33.5457	23.038	29.3088	31.2158			92.0069	92.6307	88.7078	98.5958	96.5142			65.2761	71.252	70.0646	73.798	76.7139
		95.022	87.9771	82.1118	76.3465	71.7618			25.6138	33.676	23.213	29.3758	31.2975			92.3804	92.8789	89.3826	98.7633	96.7933			65.4951	71.6428	70.2971	73.9477	77.0135
		95.8276	88.1627	82.3819	76.6373	71.9142			25.6649	33.8136	23.2642	29.4635	31.3914			92.6313	93.1873	89.658	99.6547	96.9384			65.7922	71.7638	70.5868	74.3184	77.3212
		96.0217	88.7049	82.5884	77.0134	72.087			25.7659	33.8596	23.3145	29.6456	31.4852			92.9247	93.397	90.2175	99.7856	97.343			66.0226	72.0846	70.7704	74.4773	77.6591
		96.5143	89.1459	83.0538	77.1294	72.4599			25.8956	34.0087	23.4392	29.8304	31.7011			93.3952	93.9498	90.6531	100.069	97.7051			66.2807	72.4377	70.9681	74.8352	77.8386
		96.7937	89.5267	83.4173	77.4627	72.6507			25.9584	34.0929	23.4813	29.9011	31.7976			93.9493	94.1879	90.9252	100.355	98.2298			66.4576	72.6492	71.2508	75.2302	78.2308
		96.9414	89.6587	83.6648	77.6942	72.8791			26.2092	34.2331	23.5257	30.0477	31.9096			94.1891	94.7825	91.0555	100.708	98.3495			66.8589	72.8803	71.6385	75.5181	78.4953
		97.3427	90.2547	83.8397	77.8333	73.1267			26.2781	34.2995	23.7547	30.1883	31.9938			94.7826	95.0214	91.4788	101.015	98.6862			67.0819	73.2152	71.7648	75.8717	78.8821
		97.5289	90.6509	84.4455	78.6689	73.4773			26.3381	34.512	23.8697	30.2947	32.0625			94.9067	95.6749	92.1077	101.196	99.4392			67.3754	73.4777	72.0859	76.1006	79.0682
		98.3125	90.9249	84.5572	78.9163	73.9466			26.3828	34.649	23.9264	30.489	32.139			95.0226	96	92.3371	101.565	99.6538			67.6962	73.8388	72.4371	76.3473	79.5089
		98.3538	91.0567	84.7403	79.0645	74.286			26.4916	34.7029	24.118	30.7975	32.192			95.6761	96.5161	92.6306		99.788			67.9098	73.9474	72.6303	76.6372	79.8801
		98.9126	91.4798	84.9705	79.223	74.4768			26.5954	34.8882	24.2229	31.0322	32.3188			96.5147	96.7934	92.8809		100.069			68.1613	74.2867	72.8816	76.9824	80.1154
		99.3023	92.0183	85.408	79.3483	74.9475			26.6731	35.0739	24.3774	31.1562	32.4899			96.7934	96.9406	93.1886		100.352			68.4612	74.4747	73.2544	77.3201	80.4761
		99.4415	92.1122	85.6981	79.8889	75.2306			26.7713	35.2938	24.4461	31.2156	32.5554			96.9389	97.3438	94.1883		100.707			68.7207	74.8349	73.4772	77.659	80.6303
		99.6559	92.6314	86.0689	80.3636	75.5149			26.874	35.3904	24.5081	31.2978	32.6196			97.3419	97.9566	94.7807		101.016			69.0417	75.1239	73.8388	77.8372	81.032
		100.069	92.9266	86.172	80.4768	76.0111			26.9617	35.5693	24.5507	31.3909	32.676			97.6344	98.3496	95.0211		101.194			69.3735	75.4929	73.948	78.2317	81.4168
		100.17	93.299	86.7148	80.6243	76.3441			27.1137	35.683	24.7223	31.4802	32.8601			98.1451	98.5933	95.3537		101.441			69.5782	75.6925	74.317	78.4953	81.7536
		100.354	93.3974	86.9658	81.1101	76.637			27.1588	35.7449	24.8061	31.7007	32.9558			98.3496	98.7664	95.9998		101.565			69.894	76.0096	74.6445	78.671	82.1105
		100.705	93.605	87.9766	81.5464	76.7158			27.3405	35.9549	24.9905	31.7937	33.0355			98.5956	99.4393	96.5143					70.0607	76.3441	74.9475	79.0648	82.3811
		101.023	93.9508	88.1326	81.757	77.0147			27.4075	36.043	25.1131	31.9094	33.2328			98.7676	99.6551	96.7929					70.2724	76.6351	75.2565	79.2237	82.5875
		101.195	94.1899	88.5811	82.1137	77.1266			27.482	36.0829	25.1718	31.9943	33.2817			99.4372	99.7853	96.94					70.5863	76.8828	75.5618	79.5938	83.0494
		101.565	94.7827	88.7094	82.3812	77.3963			27.5976	36.2122	25.2084	32.0617	33.3983			99.6543	100.068	97.4343					70.78	77.1275	75.8709	79.8816	83.4175
		101.933	94.9049	89.1431	82.5879	77.6931			27.6932	36.3496	25.2446	32.1401	33.5459			99.7887	100.17	97.7036					70.9668	77.3936	76.1055	80.1157	83.6642
			95.0941	89.5231	83.0532	78.0509			27.8393	36.4038	25.3387	32.1919	33.6756			100.071	100.707	97.955					71.2448	77.679	76.3471	80.4754	83.9634
			95.6766	89.659	83.4163	78.2328			27.9328	36.7237	25.4221	32.3179	33.8133			100.171	101.194	98.2309					71.6401	77.9851	76.6374	80.7072	84.2766
			95.8529	89.8582	83.5189	78.669			28.1434	36.8893	25.4838	32.4895	33.8621			100.708	101.442	98.3502					71.7635	78.2676	77.0099	81.0291	84.5576
			96.1476	90.2177	83.8325	78.9161			28.2194	37.0299	25.6146	32.5533	34.0076			101.191	101.565	98.6854					72.0832	78.496	77.3203	81.4135	84.9694
			96.5145	90.6511	84.1625	79.065			28.26	37.1904	25.6654	32.6202	34.0448			101.442		98.9908					72.315	78.7476	77.5376	81.7516	85.3244
			96.7936	90.9253	84.2799	79.224			28.3799	37.2363	25.7658	32.6794	34.0935			101.564		99.4372					72.5586	79.064	77.8342	82.1114	85.5729
			96.9403	91.0564	84.4475	79.8801			28.4367	37.3419	25.8955	32.9552	34.2339					99.6542					72.8791	79.2244	78.2313	82.381	85.8707
			97.3472	91.4781	84.9714	80.1178			28.535	37.4809	25.9599	33.0354	34.3036					99.7908					73.1202	79.6383	78.5713	82.5888	86.1717
			97.5273	92.0078	85.3297	80.4761			28.6172	37.5182	26.1468	33.1762	34.5116					100.07					73.4384	79.8811	78.745	83.0473	86.5186
			97.954	92.1065	85.4085	80.6253			28.7122	37.6405	26.2087	33.252	34.699					100.171					73.7962	80.1151	79.064	83.4008	86.8527
			98.3494	92.3797	85.8023	80.8749			28.8237	37.8559	26.2794	33.3905	34.7669					100.566					73.9437	80.4757	79.2249	83.6631	87.1298
			98.7638	92.6322	86.0696	81.5461			28.8765	37.9747	26.3823	33.5456	34.8909					100.707					74.223	80.6293	79.5401	83.9643	87.5503
			99.438	93.0193	86.1726	81.789			29.0281	38.22	26.488	33.6719	34.9511					101.015					74.3377	80.8992	79.8803	84.2778	87.8779
			99.6553	93.1873	86.5903	82.1115			29.0922	38.3132	26.6712	33.7192	35.0733					101.194					74.6455	81.3296	80.1164	84.5583	88.1326
			99.7858	93.3966	86.7068	82.3821			29.2591	38.3435	26.7701	33.8124	35.3906					101.444					74.9465	81.5493	80.412	84.854	88.5777
			100.069	93.8517	87.1158	82.5876			29.3097	38.4575	26.8687	33.8609	35.4821					101.565					75.2314	81.8674	80.627	85.0144	88.7093
			100.171	93.953	87.414	83.0518			29.6099	38.4971	26.9603	33.9723	35.5707										75.4965	82.1419	80.9637	85.3332	89.1276
			100.351	94.1879	87.7224	83.5162			29.6456	38.6052	26.99	34.0941	35.686										75.7838	82.3809	81.3599	85.5722	89.5216
			100.706	94.7806	87.9783	83.6622			29.8657	38.6703	27.1147	34.2372	35.7907										76.008	82.5883	81.5494	85.8441	89.8574
			101.195	94.9046	88.1319	83.8391			30.0458	38.9171	27.1568	34.3005	35.9356										76.3446	83.0212	81.8674	86.0721	90.2164
			101.442	95.0266	88.5818	83.9619			30.1872	39.0093	27.223	34.4503	36.0417										76.5816	83.2245	82.1423	86.4773	90.6305
			101.564	95.6752	88.7059	84.277			30.2943	39.162	27.3246	34.5146	36.0846										76.7274	83.5142	82.3821	86.7052	90.8217
				96.4972	89.1286	84.5565			30.3651	39.2139	27.4064	34.6497	36.1989										77.0114	83.8272	82.5893	86.9661	91.0579
				96.7936	89.5515	84.7431			30.4887	39.4642	27.4798	34.7023	36.3483										77.321	84.1588	83.049	87.4116	91.4092
				96.9386	89.658	84.9732			30.6115	39.4974	27.6125	34.8899	36.4035										77.4639	84.4459	83.3982	87.6898	91.7771
				97.3456	90.2168	85.406			30.7242	39.5795	27.6912	34.9538	36.6539										77.6939	84.7188	83.6635	87.977	92.0184
				97.4348	90.6511	85.6966			30.8046	39.811	27.7883	35.0721	36.7788										77.9879	84.9701	83.8862	88.1646	92.3794
				97.7042	90.8212	86.0056			30.9169	39.8881	27.8408	35.1838	37.0305										78.2665	85.3239	84.1603	88.5803	92.6311
				97.9547	90.9267	86.1724			31.0322	40.1089	27.917	35.2892	37.1968										78.4959	85.469	84.4461	88.7111	92.9257
				98.1463	91.0575	86.4007			31.1558	40.1655	28.0511	35.3919	37.236										78.6723	85.8005	84.7394	89.1181	93.2942
				98.3491	91.4096	86.5908			31.2159	40.2792	28.1418	35.4797	37.2857										79.0337	86.0683	84.9717	89.418	93.6029
				98.5903	92.0109	86.9235			31.2978	40.4278	28.2212	35.6832	37.3458										79.2226	86.3982	85.3247	89.6563	93.8553
				98.6862	92.3808	87.1352			31.391	40.5391	28.2601	35.7889	37.4795										79.5316	86.5905	85.5723	90.0358	94.1857
				99.3012	92.6307	87.4117			31.4793	40.5405	28.379	35.9553	37.5186										79.8321	86.9228	85.8041	90.2556	94.5681
				99.4395	92.7429	87.9775			31.6446	40.6471	28.4367	36.0424	37.6412										80.1132	87.135	86.0691	90.6488	94.7824
				99.6528	92.9262	88.1316			31.7006	40.959	28.5335	36.082	37.7593										80.4058	87.4756	86.4476	90.9212	95.0229
				99.7861	93.3018	88.7047			31.7925	40.9989	28.6159	36.1101	37.8557										80.6234	87.6918	86.7053	91.3986	95.3517
				100.069	93.6041	89.128			31.9084	41.1791	28.7108	36.2113	37.977										80.8737	87.9774	86.9657	91.7483	95.677
				100.171	93.854	89.3231			31.9934	41.4348	28.7929	36.3468	38.1773										81.252	88.1636	87.2509	92.0104	95.9162
				100.353	93.9815	89.5532			32.0635	41.5353	28.824	36.405	38.3109										81.5447	88.5779	87.5931	92.3372	96.4564
				101.016	94.1886	89.6585			32.138	41.6283	28.8783	36.7773	38.346										81.7886	88.7095	87.8855	92.6264	96.7926
				101.194	94.7818	90.2162			32.1908	41.8149	29.0277	36.89	38.4566										82.1127	89.0988	88.1324	92.924	96.9404
				101.563	94.9054	90.6529			32.3172	42.0349	29.0933	37.0309	38.6011										82.3802	89.3252	88.516	93.2945	97.3419
				101.933	95.0233	90.9255			32.4207	42.2064	29.3092	37.1875	38.6709										82.587	89.5514	88.7056	93.6041	97.6304
					95.3526	91.0568			32.4897	42.2823	29.377	37.2361	38.8239										83.0194	89.9761	89.1168	93.8513	97.8857
					95.8293	91.4778			32.5528	42.4865	29.469	37.2868	38.9185										83.1089	90.2167	89.3241	94.1577	98.146
					96.4874	92.0106			32.6193	42.575	29.6444	37.4234	39.0068										83.514	90.5162	89.5524	94.5187	98.35
					96.7931	92.1092			32.6804	42.6414	29.6892	37.5165	39.1621										83.8256	90.6596	89.9768	94.7802	98.6841
					96.9401	92.6303			32.9165	42.8136	29.8645	37.6403	39.3392										84.1135	90.9248	90.2519	95.0235	99.2066
					97.3425	92.7421			33.0351	43.1624	29.8971	37.7323	39.4643										84.2797	91.3983	90.6484	95.3508	99.437
					97.4352	92.9253			33.1779	43.2594	30.044	37.8566	39.4983										84.5567	91.6099	90.8236	95.8139	99.6551
					97.7766	93.1892			33.2314	43.3568	30.0975	37.9744	39.6418										84.8519	92.0017	91.0577	96.1321	100.067
					97.954	93.6256			33.391	43.4083	30.1876	38.218	39.7061										84.9741	92.1088	91.4083	96.512	100.351
					98.2295	93.8577			33.547	43.5647	30.2942	38.3158	39.8901										85.3228	92.3801	91.7501	96.7934	100.701
					98.3497	94.127			33.6721	43.709	30.3578	38.414	39.9924										85.5735	92.635	92.019	96.9423	101.015
					98.5952	94.1913			33.8132	43.772	30.4882	38.4993	40.1125										85.8012	92.9236	92.3351	97.3411	101.293
					99.2725	94.7828			33.8629	43.9081	30.551	38.5994	40.1659										86.0698	93.1863	92.6241	97.6299	101.563
					99.4396	94.9039			34.0083	44.2168	30.7233	38.6708	40.2797										86.3973	93.5503	92.9235	97.8034	101.903
					99.6557	95.0226			34.0933	44.3431	30.8175	38.9173	40.4287										86.5908	93.8503	93.1875	98.1435
					99.7886	95.3546			34.234	44.4607	30.9168	39.0081	40.5375										86.8551	94.1272	93.3966	98.3495
					100.069	95.8811			34.3015	44.5531	31.0328	39.1622	40.6449										87.1342	94.5123	93.8231	98.5948
					100.17	96.0239			34.5105	44.6008	31.2138	39.2154	40.742										87.4725	94.7795	93.9518	98.9887
					100.352	96.5156			34.6998	44.9028	31.297	39.3354	40.9022										87.669	95.0226	94.1879	99.2721
					100.705	96.7941			34.7656	44.9743	31.3915	39.4642	40.9605										87.9778	95.332	94.5688	99.6334
					100.917	96.9405			34.8897	45.0806	31.4859	39.4989	40.9998										88.1631	95.6739	94.7817	99.7845
					101.017	97.3422			34.9501	45.2073	31.6431	39.5764	41.1788										88.5779	95.8835	95.0225	100.069
					101.195	97.4343			35.0267	45.2666	31.7449	39.6432	41.4368										88.7091	96.1483	95.3353	100.351
					101.563	97.7762			35.0731	45.6171	31.7936	39.8105	41.5321										89.1172	96.5136	95.5922	100.568
					101.91	97.9561			35.3899	45.6954	31.9077	39.8895	41.5889										89.383	96.7929	95.8812	100.924
						98.3491			35.4189	45.773	31.9951	40.109	41.7591										89.5539	96.9422	96.1469	101.192
						98.5908			35.5728	45.8719	32.0634	40.1653	41.948										89.8565	97.3423	96.5143	101.442
						98.686			35.6825	45.9482	32.1388	40.2805	42.0348										90.1982	97.5967	96.7926	101.897
						99.303			35.7437	46.0517	32.1909	40.4271	42.0899										90.5643	97.804	96.9412
						99.4393			35.9534	46.188	32.2473	40.6459	42.1612										90.7048	98.1398	97.3409
						99.6536			36.0435	46.3673	32.3184	40.9581	42.2839										90.9246	98.3492	97.6291
						99.7869			36.0817	46.5102	32.4173	40.9996	42.488										91.399	98.594	97.9516
						100.068			36.1102	46.5658	32.4898	41.0604	42.5764										91.4801	98.9868	98.2273
						100.169			36.2105	46.6112	32.5532	41.1412	42.6234										91.9325	99.271	98.3506
						100.351			36.4036	46.7315	32.6191	41.1806	42.8632										92.1049	99.4402	98.6836
						100.569			36.7235	46.9115	32.6764	41.4305	42.933										92.3802	99.6552	99.1455
						100.707			36.8179	47.0787	32.7803	41.5641	43.1622										92.6294	100.067	99.4352
						101.022			36.8898	47.5519	32.8589	41.6281	43.2569										92.9234	100.335	99.6542
						101.195			36.9604	47.719	32.9557	41.7519	43.3565										93.1868	100.567	100.067
						101.565			37.0307	47.8645	33.0353	41.8494	43.4065										93.3963	100.916	100.173
						101.903			37.1866	48.1056	33.1779	42.035	43.5646										93.6265	101.191	100.512
									37.2366	48.3181	33.252	42.1599	43.7096										93.8573	101.44	100.915
									37.3389	48.3625	33.3898	42.2828	43.7743										94.1597	101.696	101.191
									37.4213	48.5287	33.5452	42.4472	43.9074										94.5113	101.931	101.441
									37.481	48.8853	33.6719	42.5752	43.9912										94.7804		101.697
									37.5172	49.0849	33.7252	42.6197	44.2202										95.0224		101.932
									37.641	49.1779	33.8112	42.8149	44.2858										95.3306
									37.7311	49.2593	33.8604	42.9319	44.3459										95.6725
									37.8559	49.406	34.0076	43.1354	44.4521										95.8821
									37.9752	49.4496	34.046	43.257	44.5529										96.2459
									38.0693	49.5599	34.0938	43.3573	44.6004										96.5126
									38.2197	49.6792	34.2368	43.408	44.6809										96.7932
									38.3151	49.849	34.3006	43.5658	44.7283										96.9397
									38.4152	49.9429	34.3407	43.7088	44.9008										97.341
									38.4983	50.2871	34.5113	43.7717	45.0812										97.5279
									38.5987	50.3687	34.6464	43.9085	45.2069										97.7735
									38.6717	50.6399	34.6999	44.1655	45.2717										98.1434
									38.8261	50.6979	34.7673	44.2871	45.4453										98.3486
									38.9211	50.902	34.8874	44.3447	45.4904										98.5907
									39.0098	51.0462	34.9489	44.4601	45.6232										98.9114
									39.1615	51.1122	35.071	44.553	45.6942										99.2707
									39.2158	51.2411	35.1827	44.5999	45.8067										99.4395
									39.4635	51.4843	35.2903	44.7269	45.8716										99.6547
									39.4992	51.6538	35.39	44.9002	45.9658										99.7879
									39.5767	52.0327	35.421	44.9725	46.0527										100.069
									39.6439	52.2239	35.5704	45.0807	46.1874										100.35
									39.8314	52.5482	35.6839	45.1625	46.3694										100.57
									39.8908	52.6042	35.7465	45.2681	46.5093										100.917
									40.1079	52.7	35.7906	45.4448	46.5626										101.191
									40.1664	52.825	35.953	45.4899	46.6114										101.44
									40.2802	52.8977	36.0424	45.6181	46.6568										101.564
									40.4264	53.0116	36.1071	45.6959	46.735										101.902
									40.483	53.1111	36.2098	45.7746	46.9114
									40.6469	53.229	36.4032	45.8122	46.9767
									40.7398	53.2817	36.6514	45.8696	47.0785
									40.9025	53.4333	36.7253	45.9468	47.4628
									40.9594	53.5074	36.8554	46.1874	47.5237
									40.9999	53.9602	36.8903	46.3688	47.6871
									41.1169	54.1161	36.9578	46.5101	47.7212
									41.1807	54.1899	37.1883	46.5647	47.8626
									41.4781	54.2289	37.2362	46.6137	47.8943
									41.5643	54.3078	37.286	46.6949	48.0442
									41.6263	54.375	37.3417	46.9119	48.1065
									41.7585	54.4705	37.4227	46.9776	48.3165
									42.0352	54.7612	37.4809	47.0807	48.3607
									42.0924	55.0829	37.5176	47.4628	48.4244
									42.16	55.1736	37.5643	47.5307	48.5288
									42.2822	55.4188	37.6405	47.7181	48.6907
									42.4885	55.6258	37.7624	47.8621	48.8341
									42.5344	55.7456	37.8585	47.8941	48.9217
									42.5785	56.0226	37.9731	48.0442	49.0884
									42.6417	56.0884	38.179	48.1058	49.1763
									42.7832	56.2562	38.3116	48.3603	49.2347
									42.9338	56.3572	38.3447	48.4261	49.2709
									43.1623	56.4724	38.4151	48.5128	49.449
									43.2234	56.6058	38.4984	48.5634	49.5148
									43.3558	56.9529	38.5526	48.8903	49.5633
									43.4057	57.117	38.604	49.1136	49.6774
									43.5653	57.4136	38.6711	49.1633	49.8486
									43.7081	57.5512	38.83	49.2333	49.943
									43.7744	57.6373	38.9205	49.2716	50.0424
									43.9086	57.6929	39.0083	49.3763	50.1206
									44.1324	57.8104	39.1593	49.45	50.2866
									44.2163	58.0893	39.2136	49.5141	50.4263
									44.3427	58.1751	39.3347	49.5641	50.6397
									44.4613	58.3073	39.4638	49.7216	50.7419
									44.5522	58.4096	39.4972	49.8492	50.9034
									44.6019	58.6072	39.5785	49.9427	51.0479
									44.6418	58.7201	39.6434	50.0431	51.1144
									44.9035	58.8311	39.7747	50.1642	51.1785
									44.9727	58.9412	39.8889	50.2868	51.2416
									45.0808	59.0327	40.1102	50.3696	51.3014
									45.2096	59.2291	40.1651	50.4777	51.3896
									45.2714	59.2945	40.2106	50.6398	51.4836
									45.4458	59.3778	40.2796	50.7428	51.5595
									45.6286	59.6502	40.4275	50.9007	51.6546
									45.6925	59.7847	40.5393	51.0484	51.7931
									45.779	59.8744	40.6476	51.112	51.9626
									45.8102	59.9543	40.7382	51.2443	52.0304
									45.9493	60.0019	40.8997	51.3023	52.1072
									46.0498	60.1174	40.9597	51.3891	52.1844
									46.1874	60.4155	40.9996	51.4835	52.2253
									46.3693	60.6555	41.0607	51.5597	52.3196
									46.5096	60.7629	41.1807	51.6541	52.4678
									46.611	60.983	41.2341	51.9225	52.5502
									46.6558	61.3651	41.4344	52.0325	52.6969
									46.7326	61.423	41.5646	52.113	52.8022
									46.9123	61.5594	41.6253	52.1853	52.83
									47.0806	61.6161	41.7608	52.319	52.8984
									47.1409	61.6873	41.8125	52.5469	53.0488
									47.5253	61.8824	42.0349	52.6982	53.1113
									47.7196	61.9328	42.0892	52.8238	53.2282
									47.862	62.1322	42.1623	52.897	53.2816
									47.8942	62.2658	42.2062	53.0499	53.4333
									48.0444	62.3796	42.2831	53.112	53.5095
									48.1052	62.4821	42.5339	53.2279	53.6031
									48.3606	62.8129	42.5743	53.2834	53.68
									48.4256	62.8712	42.6395	53.4332	53.764
									48.5115	63.004	42.7806	53.5447	53.8942
									48.5633	63.3461	42.9213	53.6328	54.1922
									48.885	63.395	43.043	53.76	54.2283
									49.0869	63.5804	43.1612	53.8412	54.3082
									49.1764	63.7121	43.2573	53.9612	54.3734
									49.2365	63.8229	43.3563	54.1896	54.4673
									49.2722	64.0307	43.409	54.2322	54.5673
									49.4501	64.124	43.5634	54.3079	54.6524
									49.556	64.2378	43.7086	54.3706	54.7645
									49.9429	64.367	43.7729	54.4709	54.8805
									50.0428	64.4945	43.9082	54.5674	55.037
									50.1637	64.5716	43.9714	54.7635	55.1737
									50.2861	64.6692	44.1302	55.0107	55.3689
									50.3674	64.8018	44.2149	55.1734	55.5806
									50.4797	64.9536	44.2854	55.3669	55.6251
									50.64	65.1376	44.3451	55.5804	55.743
									50.6961	65.2146	44.4595	55.6245	55.8745
									50.7427	65.2771	44.5517	55.7297	56.0844
									50.9014	65.4918	44.5986	56.0838	56.2492
									50.9926	65.5782	44.6838	56.2539	56.3592
									51.0474	65.6423	44.9002	56.3575	56.4772
									51.1162	65.7606	44.9715	56.4776	56.6062
									51.2424	65.8171	45.0804	56.606	56.6937
									51.3018	65.93	45.2061	56.8845	56.8842
									51.3896	66.005	45.2685	56.9547	56.9561
									51.4839	66.1841	45.3773	57.0693	57.1186
									51.5608	66.2818	45.4452	57.1682	57.1691
									51.6122	66.4267	45.6274	57.2029	57.5122
									51.7389	66.4582	45.6944	57.4845	57.638
									51.8626	66.5419	45.7746	57.5525	57.6932
									51.9611	66.8615	45.8108	57.6925	57.8063
									52.0324	67.0811	45.8752	57.8088	58.0667
									52.1824	67.1465	45.947	58.0915	58.1757
									52.2252	67.3687	46.0338	58.1753	58.2658
									52.2989	67.5739	46.1874	58.3068	58.6066
									52.3993	67.6543	46.3697	58.411	58.7351
									52.5486	67.8707	46.5093	58.5404	58.8318
									52.6046	67.9103	46.5657	58.6055	58.9399
									52.8257	67.9818	46.6114	58.739	59.0338
									52.8972	68.1623	46.6904	58.8297	59.2291
									53.1127	68.2507	46.732	58.9421	59.2945
									53.2298	68.3317	46.9105	59.0298	59.3778
									53.2815	68.4606	46.9769	59.1653	59.4125
									53.433	68.6338	47.0787	59.2309	59.6285
									53.5435	68.7198	47.1388	59.3774	59.727
									53.6332	68.8039	47.2808	59.65	59.7849
									53.7643	68.8551	47.463	59.7264	59.8723
									53.9597	69.0203	47.5277	59.8188	59.9533
									54.1199	69.1946	47.6169	59.8747	60.1185
									54.1926	69.3786	47.718	59.9542	60.187
									54.3078	69.5712	47.8616	60.0023	60.4157
									54.3785	69.6733	47.8954	60.1186	60.5901
									54.4661	69.8976	48.0448	60.187	60.6563
									54.566	69.9722	48.1063	60.4156	60.7625
									54.7618	70.16	48.3602	60.5919	60.8549
									55.0111	70.2604	48.4249	60.7626	60.9851
									55.1739	70.3655	48.5099	60.9808	61.1017
									55.3044	70.585	48.5637	61.2771	61.3682
									55.4181	70.6904	48.6918	61.3648	61.5151
									55.5798	71.0832	48.8382	61.4236	61.5623
									55.6241	71.2037	48.9223	61.5532	61.6839
									55.7304	71.3277	49.0105	61.5878	61.7578
									55.8318	71.3828	49.1128	61.6835	61.8839
									55.9324	71.5671	49.1751	61.881	61.9331
									56.0847	71.6458	49.2343	61.9304	62.04
									56.2539	71.7603	49.2641	62.0397	62.1338
									56.3577	71.882	49.4475	62.1323	62.2655
									56.4782	72.0552	49.5604	62.2987	62.4112
									56.6058	72.1997	49.6766	62.4112	62.4797
									56.8842	72.4258	49.7324	62.6629	62.6515
									56.9545	72.5254	49.8493	62.7291	62.7282
									57.1171	72.8081	49.9427	62.8129	62.8138
									57.2011	72.8787	50.0448	62.8715	62.8727
									57.4122	72.9959	50.1604	63.0065	63.0043
									57.5157	73.1164	50.2287	63.1483	63.0818
									57.6946	73.1948	50.2877	63.263	63.2619
									57.807	73.3381	50.3692	63.3469	63.3514
									58.0911	73.437	50.4716	63.3996	63.3984
									58.1432	73.4794	50.6402	63.5817	63.5804
									58.2651	73.5847	50.7429	63.7126	63.7129
									58.4072	73.9468	50.9014	63.8236	63.8236
									58.6101	74.2235	50.9956	63.8843	63.8819
									58.736	74.2875	51.0461	64.032	64.0288
									58.8293	74.7483	51.1106	64.1215	64.1244
									59.0298	74.9232	51.2427	64.2402	64.2384
									59.1276	75.0128	51.3022	64.3656	64.3703
									59.229	75.1185	51.3899	64.4948	64.4948
									59.3776	75.1919	51.4837	64.5718	64.5717
									59.5334	75.3215	51.5591	64.6684	64.6691
									59.6506	75.4924	51.6141	64.7992	64.9454
									59.8722	75.5606	51.7935	64.9542	65.1392
									59.9545	75.6921	51.9312	65.1377	65.2158
									60.1187	75.784	52.0329	65.2119	65.2777
									60.188	76.0078	52.1188	65.2769	65.4924
									60.4156	76.1002	52.187	65.3191	65.5788
									60.5411	76.2424	52.3013	65.4923	65.6421
									60.6534	76.3471	52.3603	65.5473	65.7592
									60.7641	76.4287	52.4674	65.6407	65.8174
									60.9815	76.5799	52.5498	65.7596	65.9301
									61.1595	76.7128	52.6036	65.8159	66.0048
									61.2814	76.8479	52.7142	65.9272	66.1829
									61.3686	76.9754	52.7961	66.0051	66.2819
									61.4276	77.1283	52.8286	66.091	66.3197
									61.5605	77.2334	52.8976	66.184	66.4248
									61.6098	77.3608	53.0495	66.2827	66.4587
									61.6848	77.4629	53.1128	66.424	66.542
									61.7584	77.6589	53.2283	66.4581	66.8151
									61.8812	77.9674	53.283	66.5418	67.0792
									61.931	78.1042	53.4337	66.8117	67.1469
									62.1316	78.1665	53.5416	66.9523	67.2057
									62.3165	78.2326	53.6803	67.0811	67.3681
									62.414	78.3432	53.7597	67.1455	67.4297
									62.814	78.4943	53.9603	67.2074	67.5045
									62.8735	78.652	54.1901	67.3749	67.5771
									63.0042	78.7464	54.2264	67.4293	67.8711
									63.1163	78.8822	54.3079	67.5771	67.9112
									63.2615	79.0336	54.3746	67.6553	67.9859
									63.3504	79.2227	54.465	67.7987	68.1592
									63.3987	79.3479	54.5627	67.8741	68.2514
									63.5843	79.5117	54.7625	67.9826	68.3316
									63.7298	79.578	54.8805	68.1605	68.4594
									63.8235	79.6389	55.0109	68.2489	68.7177
									63.8837	79.8816	55.1742	68.3316	68.8039
									64.0338	80.092	55.2171	68.4597	68.8564
									64.1203	80.2287	55.3073	68.5738	69.0434
									64.2384	80.3299	55.3691	68.7194	69.1937
									64.3663	80.5717	55.4188	68.8036	69.2438
									64.4955	80.6274	55.5825	68.8551	69.3354
									64.5717	81.4145	55.6275	69.0429	69.3936
									64.6687	81.5442	55.7301	69.1928	69.487
									64.8011	81.6697	55.9171	69.2803	69.5735
									64.9549	81.7521	56.0864	69.3352	69.6786
									65.1383	81.8698	56.1835	69.3922	69.7646
									65.2161	81.9165	56.2551	69.4868	69.8949
									65.2777	82.1118	56.3587	69.573	69.9696
									65.4926	82.378	56.4776	69.6778	70.0595
									65.5786	82.5271	56.6052	69.8958	70.2571
									65.6414	82.5857	56.8841	69.9695	70.4026
									65.7606	82.9005	56.9527	70.0615	70.5853
									65.8144	83.0214	57.1155	70.1176	70.69
									65.9297	83.1089	57.2005	70.4022	70.7646
									66.0053	83.6639	57.2392	70.5232	70.9648
									66.0913	83.8245	57.4124	70.5851	71.0849
									66.1827	83.8822	57.5098	70.69	71.1304
									66.2842	83.96	57.5528	70.7661	71.2051
									66.4578	84.1095	57.6931	70.965	71.3334
									66.5424	84.1601	57.8106	71.0815	71.6372
									66.8598	84.2769	57.8758	71.1265	71.7625
									66.951	84.4126	58.0001	71.2037	71.88
									67.0817	84.4494	58.0891	71.3282	71.913
									67.1452	84.4828	58.1758	71.5611	72.0847
									67.2039	84.5543	58.3076	71.6363	72.1994
									67.3679	84.6153	58.4108	71.7604	72.3131
									67.575	84.7165	58.5499	71.8795	72.4585
									67.7152	84.9325	58.608	71.9134	72.5251
									67.7999	84.9708	58.7211	71.9975	72.6244
									67.8752	85.0148	58.8292	72.057	72.8048
									68.1579	85.2286	58.9415	72.1992	72.8789
									68.2503	85.4079	59.0292	72.3121	72.9585
									68.4589	85.6903	59.228	72.4591	72.9978
									68.5749	85.7992	59.2944	72.5262	73.1183
									68.666	85.8438	59.359	72.6294	73.2532
									68.7195	86.0358	59.4123	72.8068	73.3953
									68.807	86.0685	59.6468	72.8795	73.5821
									68.8555	86.1703	59.7277	72.9968	73.7523
									69.0195	86.312	59.872	73.1182	73.9274
									69.2434	86.3831	59.9554	73.1976	74.0072
									69.338	86.6591	60.0019	73.3398	74.2226
									69.392	86.7059	60.0722	73.4385	74.2858
									69.5732	86.7732	60.1193	73.4788	74.3197
									69.6779	86.914	60.1868	73.7508	74.3884
									69.9403	86.9676	60.418	73.928	74.4749
									70.2733	87.0584	60.6561	74.004	74.597
									70.4192	87.247	60.7615	74.2243	74.7546
									70.5839	87.3612	60.9817	74.2856	74.9225
									70.6911	87.4055	61.1541	74.3203	75.013
									70.7619	87.6683	61.2811	74.3875	75.119
									70.9677	87.7876	61.3657	74.477	75.1924
									71.0834	87.9757	61.4825	74.7569	75.2332
									71.1294	88.0972	61.5858	74.9233	75.3884
									71.2037	88.1651	61.6829	75.0128	75.4924
									71.3314	88.2495	61.7561	75.1228	75.5597
									71.5633	88.493	61.8826	75.1914	75.6924
									71.6358	88.5783	61.9281	75.2326	75.8341
									71.7412	88.7052	62.0411	75.3881	76.0093
									71.8785	88.9646	62.1321	75.4929	76.1011
									72.0552	89.1933	62.2638	75.5594	76.1875
									72.1994	89.2966	62.4128	75.6914	76.3453
									72.4164	89.4183	62.4803	75.7878	76.4292
									72.4597	89.6541	62.6495	76.0072	76.579
									72.5257	89.8493	62.7293	76.0979	76.713
									72.7127	90.0917	62.8134	76.1884	76.848
									72.8155	90.1925	62.8725	76.3459	76.9782
									72.8792	90.2885	63.0038	76.4284	77.0158
									73.0013	90.3899	63.0788	76.5776	77.126
									73.1173	90.5196	63.1593	76.7133	77.2335
									73.202	90.9251	63.2615	76.8485	77.3933
									73.3421	91.0492	63.3513	76.9797	77.4628
									73.4763	91.139	63.4003	77.113	77.5415
									73.5657	91.1908	63.7122	77.235	77.663
									73.7515	91.412	63.8231	77.3631	77.9688
									73.8497	91.4768	63.8834	77.4581	78.0495
									73.9447	91.7513	64.0293	77.5382	78.1642
									74.0069	91.8397	64.1212	77.6816	78.2332
									74.223	91.9364	64.2388	77.9647	78.4937
									74.2849	92.0033	64.3681	78.0496	78.6518
									74.3183	92.1898	64.4947	78.1661	78.7438
									74.3881	92.3334	64.5711	78.2319	78.8827
									74.4748	92.5104	64.6675	78.4946	79.0648
									74.5999	92.6247	64.7965	78.6516	79.1215
									74.7523	92.7425	64.9535	78.7394	79.1893
									74.9242	92.8751	65.1377	78.8837	79.3432
									75.0145	92.9236	65.2137	78.9185	79.5103
									75.1198	93.0778	65.2755	79.0649	79.5817
									75.1917	93.1859	65.4934	79.2231	79.6405
									75.3507	93.3945	65.5802	79.3455	79.7402
									75.4931	93.5869	65.6418	79.5097	79.9895
									75.5604	93.8064	65.759	79.5821	80.0463
									75.6928	93.9498	65.8143	79.6385	80.2218
									75.7838	94.0672	65.9305	79.8805	80.3291
									76.0085	94.1885	66.0049	79.9795	80.4768
									76.1017	94.2929	66.1746	80.0453	80.5718
									76.3452	94.3849	66.2824	80.1907	80.6248
									76.4278	94.5086	66.3202	80.3294	80.8739
									76.5812	94.7816	66.427	80.4753	80.9648
									76.6279	94.9859	66.4588	80.5728	81.0732
									76.7124	95.0203	66.5421	80.6289	81.2512
									76.8476	95.0918	66.688	80.7067	81.3616
									76.9764	95.2707	66.8062	80.8726	81.4136
									77.0155	95.5879	66.9519	80.9663	81.5441
									77.127	95.6743	67.0659	81.072	81.6767
									77.2338	95.8133	67.1461	81.4133	81.756
									77.3939	95.8831	67.3713	81.5452	81.8702
									77.4608	95.9968	67.4277	81.6743	81.9664
									77.6595	96.5132	67.5757	81.7547	82.0663
									77.6936	96.6088	67.6575	81.8684	82.1137
									77.827	96.7917	67.7165	81.9158	82.2594
									77.9659	96.9388	67.8717	82.0063	82.3789
									78.05	97.0173	67.9112	82.1115	82.457
									78.2287	97.2028	67.9823	82.3795	82.5309
									78.4936	97.3433	68.1573	82.4568	82.5855
									78.651	98.017	68.2509	82.5292	82.9011
									78.7431	98.2278	68.3307	82.586	83.0202
									78.8814	98.3478	68.4592	82.7445	83.1051
									78.9189	98.5255	68.6354	82.9007	83.2673
									79.0163	98.5903	68.7208	83.0204	83.3993
									79.0649	98.6445	68.8044	83.1049	83.516
									79.2231	98.764	68.8559	83.266	83.6645
									79.3462	98.9886	69.0424	83.3989	83.8245
									79.5094	99.0257	69.1939	83.519	83.8832
									79.5838	99.2063	69.2794	83.6073	84.0137
									79.6405	99.2706	69.3749	83.8252	84.1106
									79.8808	99.4321	69.4862	83.8858	84.1619
									80.0446	99.6226	69.572	83.9639	84.2776
									80.3274	99.7866	69.6744	84.0163	84.416
									80.4498	99.9815	69.8957	84.114	84.4504
									80.5722	100.042	69.9704	84.1626	84.4853
									80.6214	100.169	70.0597	84.2762	84.5559
									80.8438	100.354	70.1638	84.3423	84.6136
									81.0727	100.481	70.3633	84.4152	84.7197
									81.2538	100.685	70.4193	84.4828	84.8527
									81.4183	100.822	70.5848	84.5522	84.9363
									81.546	101.014	70.6905	84.614	84.9722
									81.6775	101.195	70.9667	84.7172	85.2271
									81.7554	101.291	71.0792	84.8213	85.333
									81.8686	101.399	71.1381	84.9717	85.4061
									82.1114	101.439	71.2049	85.0156	85.5745
									82.2605	101.563	71.3318	85.2264	85.6896
									82.3801	101.778	71.4347	85.3267	85.7998
									82.4557		71.561	85.3806	85.8432
									82.5852		71.6379	85.571	85.998
									82.7204		71.7622	85.6888	86.0677
									82.9013		71.8653	85.7994	86.1706
									83.02		71.9109	85.844	86.3124
									83.1085		72.0613	86.0006	86.3807
									83.4031		72.2014	86.037	86.4779
									83.5183		72.2871	86.1707	86.5856
									83.6646		72.4265	86.3146	86.7039
									83.8251		72.4616	86.3803	86.7727
									83.8885		72.5257	86.4784	86.9155
									83.9609		72.6304	86.5846	87.0592
									84.0171		72.7167	86.7044	87.2467
									84.1099		72.811	86.7712	87.35
									84.1611		72.8786	86.852	87.4044
									84.2766		72.9939	86.9171	87.5201
									84.4173		73.119	87.0594	87.6678
									84.4818		73.3405	87.2482	87.7875
									84.552		73.4378	87.3624	87.9772
									84.6144		73.6223	87.415	88.0975
									84.7186		73.7522	87.5199	88.163
									84.8205		73.9448	87.6667	88.2493
									84.9322		74.0061	87.7887	88.3848
									84.9756		74.1765	87.9756	88.4933
									85.2275		74.2235	88.0979	88.58
									85.3195		74.2849	88.1345	88.7043
									85.4038		74.3205	88.1693	88.9656
									85.6902		74.3866	88.1694	89.1319
									85.7995		74.476	88.2486	89.1952
									85.8422		74.5971	88.4928	89.2977
									86.0005		74.7539	88.5783	89.3838
									86.0706		74.9232	88.7035	89.508
									86.1702		75.0146	88.8443	89.5549
									86.3799		75.1189	88.9377	89.6547
									86.4782		75.192	89.1925	89.8115
									86.7057		75.2308	89.2962	89.976
									86.7737		75.3499	89.3852	90.0928
									86.9222		75.4929	89.5081	90.1944
									86.9672		75.5591	89.6541	90.2562
									87.2472		75.6903	89.9761	90.3893
									87.35		76.0074	90.0365	90.5182
									87.4143		76.0993	90.0933	90.6315
									87.5212		76.2444	90.1933	90.9249
									87.6668		76.3441	90.3926	91.0464
									87.7904		76.4302	90.5214	91.1342
									87.9448		76.5791	90.6315	91.2028
									87.9777		76.7132	90.7763	91.2827
									88.0972		76.8475	90.8765	91.3909
									88.2482		76.9757	90.9263	91.4755
									88.3814		77.0157	91.0512	91.5945
									88.4928		77.1142	91.1351	91.675
									88.5793		77.235	91.2823	91.7527
									88.7045		77.3624	91.3776	91.9395
									89.1945		77.3943	91.4759	92.0034
									89.2962		77.4592	91.7489	92.1089
									89.4176		77.6592	91.8397	92.1937
									89.5041		77.9652	91.9362	92.3327
									89.555		78.0487	92.0028	92.3813
									89.6548		78.105	92.0496	92.4751
									89.8483		78.2324	92.3331	92.6317
									89.9795		78.4023	92.4763	92.7438
									90.0918		78.4946	92.6239	92.8752
									90.1932		78.6513	92.7467	92.9231
									90.2878		78.7464	92.875	92.9947
									90.6298		78.8847	92.9224	93.0793
									90.8799		79.0335	93.0164	93.1856
									90.9261		79.1231	93.0789	93.394
									91.0473		79.1868	93.1869	93.5126
									91.1329		79.2262	93.3942	93.5876
									91.4091		79.3467	93.5118	93.8059
									91.4757		79.5085	93.5888	93.9482
									91.595		79.5825	93.807	94.0668
									91.7493		79.6405	93.9483	94.1606
									91.8408		79.7417	94.0666	94.1896
									92.0028		79.881	94.1587	94.2906
									92.1929		80.0141	94.2908	94.3818
									92.334		80.0476	94.3849	94.5078
									92.4733		80.227	94.5106	94.7133
									92.6247		80.3315	94.6071	94.7803
									92.8767		80.5724	94.7809	94.8546
									92.9228		80.6276	94.8533	94.9033
									92.9956		80.874	94.986	95.0203
									93.0785		80.9667	95.0217	95.0924
									93.186		81.0319	95.096	95.3371
									93.3526		81.0763	95.27	95.4751
									93.3974		81.4141	95.3316	95.5887
									93.5918		81.5476	95.4714	95.6737
									93.8072		81.6703	95.5924	95.8096
									94.0666		81.7507	95.6733	95.8842
									94.1884		81.869	95.8133	95.9961
									94.2905		81.9159	95.9922	96.1319
									94.3823		81.9662	96.1331	96.4878
									94.5086		82.0641	96.4904	96.5168
									94.713		82.1125	96.6094	96.6113
									94.7803		82.3798	96.6619	96.6631
									94.8531		82.5301	96.7915	96.7929
									94.9041		82.5855	96.9381	96.937
									95.0214		82.7428	97.016	97.0181
									95.0935		82.901	97.2112	97.2054
									95.2698		83.0195	97.343	97.2975
									95.3334		83.1063	97.4157	97.3433
									95.4705		83.2674	97.6301	97.4351
									95.5914		83.4017	97.7735	97.5881
									95.6734		83.4986	97.8826	97.6325
									95.8138		83.6068	97.956	97.6829
									95.9989		83.6656	98.018	97.8822
									96.1333		83.8236	98.1451	97.955
									96.4581		83.8829	98.2293	98.0186
									96.5156		83.9649	98.3123	98.1437
									96.6096		84.0566	98.3483	98.2301
									96.6626		84.1105	98.5244	98.3095
									96.7928		84.161	98.5941	98.349
									96.937		84.2774	98.6453	98.5279
									97.0172		84.413	98.7634	98.5923
									97.2056		84.4482	98.862	98.6451
									97.3419		84.5503	98.9886	98.764
									97.4383		84.6141	99.2067	98.8315
									97.5978		84.7161	99.2707	98.951
									97.6828		84.8198	99.3879	99.2116
									97.7788		84.9324	99.4368	99.2715
									97.882		84.9722	99.6234	99.4299
									98.0172		85.0173	99.731	99.6198
									98.1455		85.2259	99.7837	99.6547
									98.2278		85.2808	100.035	99.783
									98.2771		85.3218	100.07	99.9262
									98.3481		85.4062	100.123	100.038
									98.5252		85.5724	100.169	100.068
									98.5938		85.6898	100.255	100.121
									98.6458		85.8	100.353	100.169
									98.7622		85.8436	100.481	100.256
									98.8601		86.0003	100.552	100.322
									98.9871		86.0672	100.695	100.48
									99.1433		86.1707	100.825	100.566
									99.2326		86.3121	100.92	100.686
									99.2734		86.3824	101.014	100.828
									99.4317		86.5164	101.191	100.918
									99.6194		86.7064	101.292	101.014
									99.6544		86.8517	101.39	101.191
									99.7844		86.9154	101.439	101.294
									100.036		86.9668	101.562	101.395
									100.07		87.0601	101.7	101.44
									100.122		87.2161	101.779	101.562
									100.17		87.3626	101.881	101.778
									100.352		87.4054		101.882
									100.481		87.5201
									100.555		87.6655
									100.697		87.7862
									100.824		87.8603
									100.917		87.976
									101.013		88.0317
									101.192		88.0982
									101.293		88.1648
									101.394		88.2502
									101.439		88.4925
									101.562		88.5771
									101.795		88.7039
									101.882		88.7434
											88.936
											89.1946
											89.2959
											89.3826
											89.5094
											89.6548
											89.7666
											89.977
											90.0904
											90.1934
											90.2558
											90.2907
											90.3885
											90.4637
											90.5195
											90.6332
											90.8782
											90.9261
											91.0507
											91.1377
											91.2004
											91.3914
											91.4761
											91.5948
											91.6758
											91.7495
											91.8427
											92.001
											92.2844
											92.3341
											92.3805
											92.4762
											92.624
											92.7419
											92.8755
											92.9222
											92.9974
											93.186
											93.299
											93.3947
											93.5167
											93.5896
											93.6844
											93.8056
											94.0671
											94.161
											94.2911
											94.3844
											94.5091
											94.7111
											94.7828
											94.8555
											94.9853
											95.0226
											95.0944
											95.2696
											95.3335
											95.4726
											95.5907
											95.6732
											95.8152
											95.9979
											96.1357
											96.4854
											96.6321
											96.7921
											96.9379
											97.0167
											97.2083
											97.3421
											97.417
											97.5992
											97.7027
											97.881
											98.0159
											98.1182
											98.2287
											98.348
											98.5252
											98.5905
											98.6444
											98.7622
											98.8587
											98.988
											99.0566
											99.2096
											99.271
											99.3916
											99.4361
											99.6549
											99.783
											100.037
											100.07
											100.122
											100.17
											100.252
											100.352
											100.481
											100.569
											100.692
											100.823
											100.913
											101.015
											101.192
											101.291
											101.394
											101.439
											101.564
											101.778
											101.903

## Sheet: panel C-membrane potential
MEMBRANE POTENTIAL (mV), corrected for junction potential
	Baseline	Block native Im	Block +virtual IM	Block +virtual IM
Trial 1	-54.1717	-42.5899	-56.5027	-57.113
Trial 2	-53.7873	-41.6467	-56.8519	-56.7813
Trial 3	-53.8846	-43.9252	-57.0228	-58.6234
Trial 4	-53.416	-43.0755	-57.0704	-59.4815
Trial 5	-52.2377	-41.6053	-57.1323	-59.7269
avg	-53.4995	-42.5685	-56.916	-58.3452
stdev	0.75533	0.984329	0.253455	1.34553

## Sheet: panel D-spike amplitude
SPIKE AMPLITUDE (mV), measured from threshold to peak
	Baseline	Block native Im	Block +virtual IM	Block +virtual IM
Trial 1	67.2253	35.0918	54.1678	55.925
Trial 2	65.6523	31.7184	54.3079	57.2676
Trial 3	63.7703	38.0774	54.0725	57.3367
Trial 4	61.243	32.8643	53.9375	57.234
Trial 5	58.1141	31.9857	54.4115	58.3293
avg	63.201	33.9475	54.1794	57.2185
stdev	3.6138	2.66253	0.18739	0.854933

## Sheet: panel E-firing rate
FIRING RATE (spikes/s)
	Baseline	Block native Im	Block +virtual IM	Block +virtual IM
Trial 1	2.7121	8.6066	2.7872	3.8555
Trial 2	2.9501	7.1412	2.7806	3.5909
Trial 3	3.1417	9.717	2.8979	3.5927
Trial 4	3.3913	8.5366	2.6061	3.434
Trial 5	3.5621	8.5665	2.6665	3.2808
avg	3.15146	8.51358	2.74766	3.55078
stdev	0.339053	0.91428	0.113849	0.213745

## Sheet: panel F-CVisi
COEFFICIENT OF VARIATION of the interspike interval
	Baseline	Block native Im	Block +virtual IM	Block +virtual IM
Trial 1	0.6252	0.5296	0.5468	0.304
Trial 2	0.586	0.6165	0.521	0.299
Trial 3	0.594	0.4884	0.5515	0.288
Trial 4	0.5727	0.5199	0.5563	0.286
Trial 5	0.5564	0.5325	0.5396	0.277
avg	0.58686	0.53738	0.54304	0.2908
stdev	0.025739	0.0475629	0.0137762	0.0107564
