# Supplementary material for: Minimal requirements for a neuron to coregulate many properties and the implications for ion channel correlations and robustness
Source: eLife. 2022 Mar 16;11:e72875. doi: 10.7554/eLife.72875 (PMC8986315; doi:10.7554/eLife.72875)
Supplement: Supplementary file 1. — When a conductance is not regulated, its density was fixed at the average. [file elife-72875-supp1.xlsx]

## Sheet: Sheet1
Table S1. Initial conductance values and regulation rates for each figure
Initial conductance values (mS/cm2):
	gNa	gK	gleak	gM	gAHP
mean	3.5	0.7	2	1.75	0.5
stdev	0.1	0.1	0.1	0.1	0.1
*When a conductance is not regulated, its conductance is fixed at the mean value.
Regulation rates ti,j:
	ion channel i
	gNa	gK	gleak	gM	gAHP	error signal j
Figure 4	-60	N/A	60	N/A	N/A	FR
Figure 6	-400	100	N/A	100	100	FR
	0.15	0.105	N/A	0.105	0.105	EE
Figure 7 - cyan	-300	300	N/A	60	N/A	FR
	0.25	-0.05	N/A	0.025	N/A	EE
Figure 7 - magenta	-360	60	N/A	-120	N/A	FR
	0.2143	-0.05	N/A	0.0714	N/A	EE
Figure 9	-100	-600	N/A	-180	N/A	FR
	0.15	-0.09	N/A	-0.06	N/A	EE
Figure 10	-105	225	N/A	-210	N/A	FR
	0.0625	-0.625	N/A	0.0875	N/A	EE
Firing rate (FR); energy efficiency (EE)
